# Supplementary material for: A novel image segmentation method based on spatial autocorrelation identifies A-type potassium channel clusters in the thalamus
Source: eLife. 2024 Dec 10;12:RP89361. doi: 10.7554/eLife.89361 (PMC11630814; doi:10.7554/eLife.89361)
Supplement: Figure 2—source data 1. [file elife-89361-fig2-data1.xlsx]

## Sheet: Fig 02 e
Noise 0					Noise 80					Noise 160							Noise 0				Noise 80				Noise 160
No of generated image	Moran's order	TP	FP		No of generated image	Moran's order	TP	FP		No of generated image	Moran's order	TP	FP				No of generated image	TP	FP		No of generated image	TP	FP		No of generated image	TP	FP				No of pixels			No of pixels in selection
1	4	12584	1		1	4	12170	1245		1	4	8351	859				1	12584	0		1	11438	19594		1	8569	56745			objects	12584					FP	TP	TP	TP	TP	TP	TP
2	4	12582	1		2	4	12136	1276		2	4	8223	747				2	12584	0		2	11496	19662		2	8475	56976			whole image	160000						Noise 0	Noise 0	Noise 80	Noise 80	Noise 160	Noise 160
3	4	12584	1		3	4	12219	1240		3	4	8336	879				3	12584	0		3	11500	19627		3	8516	56811			background	147416			Noise 0	thr	0	12584
4	4	12583	1		4	4	12187	1302		4	4	8258	798				4	12584	0		4	11465	19493		4	8553	57287								Moran	1		12583.7
5	4	12582	1		5	4	12174	1283		5	4	8320	936				5	12584	0		5	11440	19596		5	8547	56889							Noise 80	thr	19663.5			11472.1
6	4	12584	1		6	4	12163	1201		6	4	8404	824				6	12584	0		6	11478	19421		6	8639	57153								Moran	1252.44				12173.5
7	4	12582	1		7	4	12149	1246		7	4	8370	726				7	12584	0		7	11392	19693		7	8551	56895							Noise 160	thr	56984.6					8556.23
8	4	12584	1		8	4	12185	1238		8	4	8214	837				8	12584	0		8	11489	20008		8	8504	56905								Moran	816.21						8556.23
9	4	12584	1		9	4	12162	1262		9	4	8406	902				9	12584	0		9	11519	19652		9	8574	56729
10	4	12584	1		10	4	12178	1235		10	4	8164	739				10	12584	0		10	11482	19605		10	8456	56881
11	4	12584	1		11	4	12150	1292		11	4	8251	910				11	12584	0		11	11478	19620		11	8511	57020
12	4	12584	1		12	4	12219	1223		12	4	8271	886				12	12584	0		12	11467	19752		12	8576	57076							True/False positive rates in selection
13	4	12584	1		13	4	12180	1262		13	4	8279	783				13	12584	0		13	11475	19611		13	8508	56752									FPR	TPR	TPR	TPR	TPR	TPR	TPR
14	4	12584	1		14	4	12137	1246		14	4	8172	769				14	12584	0		14	11451	19883		14	8485	57016										Noise 0	Noise 0	Noise 80	Noise 80	Noise 160	Noise 160
15	4	12584	1		15	4	12140	1240		15	4	8229	845				15	12584	0		15	11457	19678		15	8473	56613							Noise 0	thr	0	1
16	4	12584	1		16	4	12212	1248		16	4	8318	621				16	12584	0		16	11495	19770		16	8526	56754								Moran	6.78352e-06		0.999977
17	4	12584	1		17	4	12181	1198		17	4	8196	789				17	12584	0		17	11497	19895		17	8443	56882							Noise 80	thr	0.133388			0.911644
18	4	12584	1		18	4	12183	1292		18	4	8272	802				18	12584	0		18	11479	19762		18	8529	56787								Moran	0.00849596				0.967375
19	4	12584	1		19	4	12164	1283		19	4	8329	760				19	12584	0		19	11455	19752		19	8596	57317							Noise 160	thr	0.386556					0.679929
20	4	12584	1		20	4	12160	1221		20	4	8395	825				20	12584	0		20	11450	19678		20	8581	56715								Moran	0.00553678						0.679929
21	4	12584	1		21	4	12175	1250		21	4	8395	818				21	12584	0		21	11512	19670		21	8508	57104
22	4	12582	1		22	4	12158	1235		22	4	8320	704				22	12584	0		22	11453	19680		22	8543	56852
23	4	12582	1		23	4	12209	1285		23	4	8406	1023				23	12584	0		23	11480	19718		23	8613	56906
24	4	12584	1		24	4	12219	1193		24	4	8346	828				24	12584	0		24	11456	19382		24	8533	57015
25	4	12584	1		25	4	12138	1232		25	4	8361	833				25	12584	0		25	11432	19715		25	8600	56841
26	4	12583	1		26	4	12150	1183		26	4	8444	806				26	12584	0		26	11452	19871		26	8734	56783
27	4	12584	1		27	4	12180	1300		27	4	8388	884				27	12584	0		27	11471	19720		27	8586	56773
28	4	12584	1		28	4	12206	1244		28	4	8318	899				28	12584	0		28	11422	19746		28	8532	56988
29	4	12584	1		29	4	12183	1222		29	4	8304	842				29	12584	0		29	11460	19954		29	8562	57045
30	4	12584	1		30	4	12199	1242		30	4	8312	661				30	12584	0		30	11513	19681		30	8532	56820
31	4	12584	1		31	4	12159	1287		31	4	8426	723				31	12584	0		31	11505	19609		31	8574	56780
32	4	12584	1		32	4	12157	1190		32	4	8403	856				32	12584	0		32	11482	19708		32	8631	57199
33	4	12584	1		33	4	12166	1199		33	4	8286	761				33	12584	0		33	11455	19452		33	8512	56856
34	4	12584	1		34	4	12139	1243		34	4	8369	814				34	12584	0		34	11432	19416		34	8622	56804
35	4	12584	1		35	4	12218	1247		35	4	8501	687				35	12584	0		35	11500	19575		35	8607	56699
36	4	12584	1		36	4	12165	1208		36	4	8344	804				36	12584	0		36	11499	19718		36	8559	56990
37	4	12584	1		37	4	12153	1225		37	4	8456	883				37	12584	0		37	11491	19629		37	8677	57074
38	4	12584	1		38	4	12173	1299		38	4	8336	704				38	12584	0		38	11515	19617		38	8587	56918
39	4	12584	1		39	4	12172	1290		39	4	8393	839				39	12584	0		39	11471	19836		39	8588	56792
40	4	12584	1		40	4	12214	1304		40	4	8172	749				40	12584	0		40	11514	19540		40	8523	57365
41	4	12584	1		41	4	12217	1265		41	4	8261	716				41	12584	0		41	11482	19795		41	8520	57090
42	4	12584	1		42	4	12166	1281		42	4	8434	729				42	12584	0		42	11439	19764		42	8571	57038
43	4	12584	1		43	4	12210	1219		43	4	8318	812				43	12584	0		43	11487	19624		43	8546	57002
44	4	12584	1		44	4	12159	1254		44	4	8416	899				44	12584	0		44	11496	19762		44	8588	56856
45	4	12584	1		45	4	12183	1219		45	4	8274	803				45	12584	0		45	11484	19560		45	8570	56896
46	4	12584	1		46	4	12194	1247		46	4	8235	907				46	12584	0		46	11473	19583		46	8496	56807
47	4	12583	1		47	4	12130	1275		47	4	8288	1032				47	12584	0		47	11435	19596		47	8536	57133
48	4	12584	1		48	4	12100	1177		48	4	8191	828				48	12584	0		48	11418	19570		48	8461	57131
49	4	12584	1		49	4	12086	1170		49	4	8387	845				49	12584	0		49	11451	19573		49	8587	56876
50	4	12583	1		50	4	12196	1301		50	4	8297	722				50	12584	0		50	11439	19709		50	8571	57200
51	4	12580	1		51	4	12153	1250		51	4	8279	757				51	12584	0		51	11428	19807		51	8543	56563
52	4	12584	1		52	4	12212	1226		52	4	8302	789				52	12584	0		52	11439	19838		52	8551	57143
53	4	12584	1		53	4	12168	1239		53	4	8421	746				53	12584	0		53	11500	19668		53	8575	57062
54	4	12584	1		54	4	12140	1282		54	4	8334	901				54	12584	0		54	11495	19614		54	8580	56971
55	4	12584	1		55	4	12189	1114		55	4	8320	866				55	12584	0		55	11543	19648		55	8572	56929
56	4	12584	1		56	4	12185	1289		56	4	8255	848				56	12584	0		56	11512	19492		56	8515	57049
57	4	12581	1		57	4	12098	1205		57	4	8359	792				57	12584	0		57	11422	19567		57	8562	57237
58	4	12584	1		58	4	12209	1365		58	4	8476	779				58	12584	0		58	11496	19793		58	8684	57036
59	4	12584	1		59	4	12146	1214		59	4	8309	901				59	12584	0		59	11473	19600		59	8505	56916
60	4	12584	1		60	4	12196	1241		60	4	8299	805				60	12584	0		60	11440	19734		60	8528	56920
61	4	12584	1		61	4	12117	1205		61	4	8326	830				61	12584	0		61	11447	19783		61	8516	57091
62	4	12584	1		62	4	12185	1344		62	4	8149	866				62	12584	0		62	11453	19605		62	8486	57428
63	4	12584	1		63	4	12208	1245		63	4	8396	785				63	12584	0		63	11461	19610		63	8626	57128
64	4	12584	1		64	4	12223	1240		64	4	8297	725				64	12584	0		64	11490	19487		64	8528	56974
65	4	12584	1		65	4	12194	1274		65	4	8195	757				65	12584	0		65	11503	19912		65	8492	56914
66	4	12584	1		66	4	12201	1261		66	4	8298	830				66	12584	0		66	11463	19619		66	8627	57178
67	4	12584	1		67	4	12162	1193		67	4	8257	768				67	12584	0		67	11469	19708		67	8549	57208
68	4	12584	1		68	4	12189	1201		68	4	8301	728				68	12584	0		68	11479	19661		68	8586	57022
69	4	12584	1		69	4	12151	1221		69	4	8404	812				69	12584	0		69	11466	19316		69	8649	57312
70	4	12584	1		70	4	12111	1227		70	4	8301	884				70	12584	0		70	11453	19427		70	8510	56993
71	4	12583	1		71	4	12136	1310		71	4	8308	855				71	12584	0		71	11462	19698		71	8626	56952
72	4	12584	1		72	4	12171	1295		72	4	8323	722				72	12584	0		72	11537	19645		72	8585	56822
73	4	12584	1		73	4	12169	1308		73	4	8374	988				73	12584	0		73	11448	19706		73	8554	56852
74	4	12583	1		74	4	12170	1242		74	4	8224	829				74	12584	0		74	11503	19456		74	8557	57066
75	4	12583	1		75	4	12156	1170		75	4	8209	666				75	12584	0		75	11475	19680		75	8501	57399
76	4	12584	1		76	4	12180	1244		76	4	8308	898				76	12584	0		76	11447	19697		76	8553	57335
77	4	12584	1		77	4	12221	1325		77	4	8422	765				77	12584	0		77	11447	19756		77	8594	56936
78	4	12584	1		78	4	12189	1297		78	4	8406	672				78	12584	0		78	11452	19773		78	8607	57093
79	4	12584	1		79	4	12161	1230		79	4	8320	757				79	12584	0		79	11492	19496		79	8586	56805
80	4	12584	1		80	4	12163	1210		80	4	8319	852				80	12584	0		80	11406	19572		80	8579	56811
81	4	12583	1		81	4	12214	1323		81	4	8246	709				81	12584	0		81	11492	19545		81	8509	57015
82	4	12584	1		82	4	12157	1230		82	4	8145	881				82	12584	0		82	11506	19744		82	8456	56910
83	4	12584	1		83	4	12263	1302		83	4	8339	934				83	12584	0		83	11487	19636		83	8550	56827
84	4	12584	1		84	4	12149	1274		84	4	8218	772				84	12584	0		84	11472	19909		84	8475	57012
85	4	12583	1		85	4	12235	1313		85	4	8301	813				85	12584	0		85	11502	19567		85	8608	56876
86	4	12583	1		86	4	12190	1329		86	4	8328	899				86	12584	0		86	11474	19832		86	8570	57274
87	4	12584	1		87	4	12162	1229		87	4	8353	924				87	12584	0		87	11483	19848		87	8604	56963
88	4	12584	1		88	4	12111	1247		88	4	8337	843				88	12584	0		88	11420	19584		88	8595	57379
89	4	12584	1		89	4	12142	1294		89	4	8258	797				89	12584	0		89	11424	19679		89	8569	56950
90	4	12584	1		90	4	12166	1352		90	4	8280	930				90	12584	0		90	11514	19784		90	8493	57156
91	4	12584	1		91	4	12165	1293		91	4	8375	818				91	12584	0		91	11511	19704		91	8620	57258
92	4	12584	1		92	4	12165	1337		92	4	8373	782				92	12584	0		92	11503	19796		92	8566	56850
93	4	12583	1		93	4	12145	1274		93	4	8208	853				93	12584	0		93	11468	19614		93	8505	56865
94	4	12584	1		94	4	12225	1244		94	4	8323	898				94	12584	0		94	11457	19467		94	8544	56826
95	4	12584	1		95	4	12198	1237		95	4	8278	690				95	12584	0		95	11448	19561		95	8563	57162
96	4	12583	1		96	4	12170	1209		96	4	8425	709				96	12584	0		96	11494	19644		96	8586	56816
97	4	12584	1		97	4	12173	1172		97	4	8260	909				97	12584	0		97	11501	19575		97	8583	57144
98	4	12584	1		98	4	12175	1249		98	4	8324	836				98	12584	0		98	11464	19590		98	8570	57244
99	4	12584	1		99	4	12194	1264		99	4	8429	995				99	12584	0		99	11477	19819		99	8515	56870
100	4	12584	1		100	4	12170	1286		100	4	8247	808				100	12584	0		100	11493	19555		100	8535	57080

## Sheet: Fig 02 f
	Noise 80	No of generated images	TPR	FPR		Noise 160	No of generated images	TPR	FPR			Noise 80	No of generated images	TPR	FPR		Noise 160	No of generated images	TPR	FPR
thr		1	0.90893	0.13292			1	0.68094	0.38493		Moran's order		1	0.9671	0.00845			1	0.66362	0.00583
120		2	0.91354	0.13338			2	0.67347	0.3865		4		2	0.9644	0.00866			2	0.65345	0.00507
		3	0.91386	0.13314			3	0.67673	0.38538				3	0.97099	0.00841			3	0.66243	0.00596
		4	0.91108	0.13223			4	0.67967	0.38861				4	0.96845	0.00883			4	0.65623	0.00541
		5	0.90909	0.13293			5	0.6792	0.38591				5	0.96742	0.0087			5	0.66116	0.00635
		6	0.91211	0.13174			6	0.68651	0.3877				6	0.96654	0.00815			6	0.66783	0.00559
		7	0.90528	0.13359			7	0.67951	0.38595				7	0.96543	0.00845			7	0.66513	0.00492
		8	0.91298	0.13572			8	0.67578	0.38602				8	0.96829	0.0084			8	0.65273	0.00568
		9	0.91537	0.13331			9	0.68134	0.38482				9	0.96647	0.00856			9	0.66799	0.00612
		10	0.91243	0.13299			10	0.67196	0.38585				10	0.96774	0.00838			10	0.64876	0.00501
		11	0.91211	0.13309			11	0.67634	0.3868				11	0.96551	0.00876			11	0.65567	0.00617
		12	0.91124	0.13399			12	0.6815	0.38718				12	0.97099	0.0083			12	0.65726	0.00601
		13	0.91187	0.13303			13	0.6761	0.38498				13	0.9679	0.00856			13	0.6579	0.00531
		14	0.90997	0.13488			14	0.67427	0.38677				14	0.96448	0.00845			14	0.6494	0.00522
		15	0.91044	0.13349			15	0.67332	0.38404				15	0.96472	0.00841			15	0.65393	0.00573
		16	0.91346	0.13411			16	0.67753	0.38499				16	0.97044	0.00847			16	0.661	0.00421
		17	0.91362	0.13496			17	0.67093	0.38586				17	0.96798	0.00813			17	0.6513	0.00535
		18	0.91219	0.13406			18	0.67777	0.38522				18	0.96813	0.00876			18	0.65734	0.00544
		19	0.91028	0.13399			19	0.68309	0.38881				19	0.96662	0.0087			19	0.66187	0.00516
		20	0.90989	0.13349			20	0.6819	0.38473				20	0.96631	0.00828			20	0.66712	0.0056
		21	0.91481	0.13343			21	0.6761	0.38737				21	0.9675	0.00848			21	0.66712	0.00555
		22	0.91012	0.1335			22	0.67888	0.38566				22	0.96615	0.00838			22	0.66116	0.00478
		23	0.91227	0.13376			23	0.68444	0.38602				23	0.9702	0.00872			23	0.66799	0.00694
		24	0.91036	0.13148			24	0.67808	0.38676				24	0.97099	0.00809			24	0.66322	0.00562
		25	0.90846	0.13374			25	0.68341	0.38558				25	0.96456	0.00836			25	0.66442	0.00565
		26	0.91004	0.1348			26	0.69406	0.38519				26	0.96551	0.00802			26	0.67101	0.00547
		27	0.91155	0.13377			27	0.68229	0.38512				27	0.9679	0.00882			27	0.66656	0.006
		28	0.90766	0.13395			28	0.678	0.38658				28	0.96996	0.00844			28	0.661	0.0061
		29	0.91068	0.13536			29	0.68039	0.38697				29	0.96813	0.00829			29	0.65989	0.00571
		30	0.91489	0.13351			30	0.678	0.38544				30	0.96941	0.00843			30	0.66052	0.00448
		31	0.91426	0.13302			31	0.68134	0.38517				31	0.96623	0.00873			31	0.66958	0.0049
		32	0.91243	0.13369			32	0.68587	0.38801				32	0.96607	0.00807			32	0.66775	0.00581
		33	0.91028	0.13195			33	0.67641	0.38568				33	0.96678	0.00813			33	0.65846	0.00516
		34	0.90846	0.13171			34	0.68516	0.38533				34	0.96464	0.00843			34	0.66505	0.00552
		35	0.91386	0.13279			35	0.68396	0.38462				35	0.97092	0.00846			35	0.67554	0.00466
		36	0.91378	0.13376			36	0.68015	0.38659				36	0.9667	0.00819			36	0.66306	0.00545
		37	0.91314	0.13315			37	0.68953	0.38716				37	0.96575	0.00831			37	0.67196	0.00599
		38	0.91505	0.13307			38	0.68237	0.3861				38	0.96734	0.00881			38	0.66243	0.00478
		39	0.91155	0.13456			39	0.68245	0.38525				39	0.96726	0.00875			39	0.66696	0.00569
		40	0.91497	0.13255			40	0.67729	0.38914				40	0.9706	0.00885			40	0.6494	0.00508
		41	0.91243	0.13428			41	0.67705	0.38727				41	0.97084	0.00858			41	0.65647	0.00486
		42	0.90901	0.13407			42	0.6811	0.38692				42	0.96678	0.00869			42	0.67022	0.00495
		43	0.91283	0.13312			43	0.67912	0.38667				43	0.97028	0.00827			43	0.661	0.00551
		44	0.91354	0.13406			44	0.68245	0.38568				44	0.96623	0.00851			44	0.66879	0.0061
		45	0.91259	0.13269			45	0.68102	0.38596				45	0.96813	0.00827			45	0.6575	0.00545
		46	0.91171	0.13284			46	0.67514	0.38535				46	0.96901	0.00846			46	0.6544	0.00615
		47	0.90869	0.13293			47	0.67832	0.38756				47	0.96392	0.00865			47	0.65861	0.007
		48	0.90734	0.13275			48	0.67236	0.38755				48	0.96154	0.00798			48	0.65091	0.00562
		49	0.90997	0.13277			49	0.68237	0.38582				49	0.96043	0.00794			49	0.66648	0.00573
		50	0.90901	0.1337			50	0.6811	0.38802				50	0.96917	0.00883			50	0.65933	0.0049
		51	0.90814	0.13436			51	0.67888	0.3837				51	0.96575	0.00848			51	0.6579	0.00514
		52	0.90901	0.13457			52	0.67951	0.38763				52	0.97044	0.00832			52	0.65973	0.00535
		53	0.91386	0.13342			53	0.68142	0.38708				53	0.96694	0.0084			53	0.66918	0.00506
		54	0.91346	0.13305			54	0.68182	0.38646				54	0.96472	0.0087			54	0.66227	0.00611
		55	0.91728	0.13328			55	0.68118	0.38618				55	0.96861	0.00756			55	0.66116	0.00587
		56	0.91481	0.13222			56	0.67665	0.38699				56	0.96829	0.00874			56	0.65599	0.00575
		57	0.90766	0.13273			57	0.68039	0.38827				57	0.96138	0.00817			57	0.66426	0.00537
		58	0.91354	0.13427			58	0.69008	0.38691				58	0.9702	0.00926			58	0.67355	0.00528
		59	0.91171	0.13296			59	0.67586	0.38609				59	0.96519	0.00824			59	0.66028	0.00611
		60	0.90909	0.13387			60	0.67769	0.38612				60	0.96917	0.00842			60	0.65949	0.00546
		61	0.90965	0.1342			61	0.67673	0.38728				61	0.96289	0.00817			61	0.66163	0.00563
		62	0.91012	0.13299			62	0.67435	0.38956				62	0.96829	0.00912			62	0.64757	0.00587
		63	0.91076	0.13302			63	0.68547	0.38753				63	0.97012	0.00845			63	0.6672	0.00533
		64	0.91306	0.13219			64	0.67769	0.38648				64	0.97131	0.00841			64	0.65933	0.00492
		65	0.9141	0.13507			65	0.67483	0.38608				65	0.96901	0.00864			65	0.65122	0.00514
		66	0.91092	0.13309			66	0.68555	0.38787				66	0.96956	0.00855			66	0.65941	0.00563
		67	0.9114	0.13369			67	0.67935	0.38807				67	0.96647	0.00809			67	0.65615	0.00521
		68	0.91219	0.13337			68	0.68229	0.38681				68	0.96861	0.00815			68	0.65965	0.00494
		69	0.91116	0.13103			69	0.6873	0.38878				69	0.96559	0.00828			69	0.66783	0.00551
		70	0.91012	0.13178			70	0.67626	0.38661				70	0.96241	0.00832			70	0.65965	0.006
		71	0.91084	0.13362			71	0.68547	0.38634				71	0.9644	0.00889			71	0.6602	0.0058
		72	0.9168	0.13326			72	0.68222	0.38545				72	0.96718	0.00878			72	0.6614	0.0049
		73	0.90973	0.13368			73	0.67975	0.38566				73	0.96702	0.00887			73	0.66545	0.0067
		74	0.9141	0.13198			74	0.67999	0.38711				74	0.9671	0.00843			74	0.65353	0.00562
		75	0.91187	0.1335			75	0.67554	0.38937				75	0.96599	0.00794			75	0.65234	0.00452
		76	0.90965	0.13362			76	0.67967	0.38893				76	0.9679	0.00844			76	0.6602	0.00609
		77	0.90965	0.13402			77	0.68293	0.38623				77	0.97115	0.00899			77	0.66926	0.00519
		78	0.91004	0.13413			78	0.68396	0.38729				78	0.96861	0.0088			78	0.66799	0.00456
		79	0.91322	0.13225			79	0.68229	0.38534				79	0.96639	0.00834			79	0.66116	0.00514
		80	0.90639	0.13277			80	0.68174	0.38538				80	0.96654	0.00821			80	0.66108	0.00578
		81	0.91322	0.13258			81	0.67618	0.38676				81	0.9706	0.00897			81	0.65528	0.00481
		82	0.91434	0.13393			82	0.67196	0.38605				82	0.96607	0.00834			82	0.64725	0.00598
		83	0.91283	0.1332			83	0.67943	0.38549				83	0.97449	0.00883			83	0.66267	0.00634
		84	0.91163	0.13505			84	0.67347	0.38674				84	0.96543	0.00864			84	0.65305	0.00524
		85	0.91402	0.13273			85	0.68404	0.38582				85	0.97227	0.00891			85	0.65965	0.00552
		86	0.91179	0.13453			86	0.68102	0.38852				86	0.96869	0.00902			86	0.66179	0.0061
		87	0.91251	0.13464			87	0.68373	0.38641				87	0.96647	0.00834			87	0.66378	0.00627
		88	0.9075	0.13285			88	0.68301	0.38923				88	0.96241	0.00846			88	0.66251	0.00572
		89	0.90782	0.13349			89	0.68094	0.38632				89	0.96488	0.00878			89	0.65623	0.00541
		90	0.91497	0.13421			90	0.6749	0.38772				90	0.96678	0.00917			90	0.65798	0.00631
		91	0.91473	0.13366			91	0.685	0.38841				91	0.9667	0.00877			91	0.66553	0.00555
		92	0.9141	0.13429			92	0.68071	0.38564				92	0.9667	0.00907			92	0.66537	0.0053
		93	0.91132	0.13305			93	0.67586	0.38575				93	0.96511	0.00864			93	0.65226	0.00579
		94	0.91044	0.13205			94	0.67896	0.38548				94	0.97147	0.00844			94	0.6614	0.00609
		95	0.90973	0.13269			95	0.68047	0.38776				95	0.96933	0.00839			95	0.65782	0.00468
		96	0.91338	0.13326			96	0.68229	0.38541				96	0.9671	0.0082			96	0.6695	0.00481
		97	0.91394	0.13279			97	0.68206	0.38764				97	0.96734	0.00795			97	0.65639	0.00617
		98	0.911	0.13289			98	0.68102	0.38832				98	0.9675	0.00847			98	0.66147	0.00567
		99	0.91203	0.13444			99	0.67665	0.38578				99	0.96901	0.00857			99	0.66982	0.00675
		100	0.9133	0.13265			100	0.67824	0.3872				100	0.9671	0.00872			100	0.65536	0.00548
