# Supplementary material for: A novel image segmentation method based on spatial autocorrelation identifies A-type potassium channel clusters in the thalamus
Source: eLife. 2024 Dec 10;12:RP89361. doi: 10.7554/eLife.89361 (PMC11630814; doi:10.7554/eLife.89361)
Supplement: Figure 3—source data 1. [file elife-89361-fig3-data1.xlsx]

## Sheet: Fig 3f
	Noise 0	thr levels	TP	FP		Noise 80	thr levels	TP	FP		Noise 160	thr levels	TP	FP
		1	0	0			1	0	0			1	0	0
		2	2295	31173			2	2292	31457			2	2289	31531			Selected threshold levels
		3	2295	29593			3	2276	31029			3	2279	31134
		4	2295	27166			4	2263	30598			4	2263	30762
		5	2295	24069			5	2252	30104			5	2244	30382		Noise 0	thr levels	TP	FP			Noise 80	thr levels	TP	FP			Nosie 160	thr levels	TP	FP
		6	2295	21006			6	2242	29678			6	2230	29982			25	2273	3835				25	2057	21055				25	1895	22692
		7	2294	18259			7	2231	29207			7	2221	29603			50	2063	1161				50	1726	11238				50	1473	14062
		8	2293	15739			8	2220	28734			8	2196	29193			75	1719	418				75	1310	4905				75	1004	7663
		9	2293	13787			9	2213	28260			9	2175	28805			100	1393	176				100	916	1738				100	629	3542
		10	2290	12150			10	2202	27785			10	2165	28406			125	1116	74				125	600	485				125	358	1411
		11	2290	10819			11	2198	27351			11	2150	27997			150	883	29				150	352	111				150	177	488
		12	2290	9811			12	2188	26873			12	2126	27592			175	689	14				175	164	20				175	61	137
		13	2290	8905			13	2179	26384			13	2107	27188			200	544	6				200	76	5				200	20	43
		14	2290	8106			14	2170	25924			14	2090	26805			225	420	3				225	24	2				225	9	11
		15	2289	7431			15	2158	25524			15	2072	26404
		16	2288	6850			16	2147	25048			16	2053	26049
		17	2287	6334			17	2135	24574			17	2035	25648
		18	2285	5935			18	2126	24132			18	2015	25266
		19	2285	5553			19	2120	23707			19	2000	24863
		20	2284	5187			20	2103	23247			20	1981	24500
		21	2282	4843			21	2095	22771			21	1969	24157
		22	2281	4531			22	2090	22343			22	1947	23810
		23	2279	4272			23	2075	21948			23	1933	23451
		24	2274	4057			24	2063	21474			24	1918	23041
		25	2273	3835			25	2057	21055			25	1895	22692
		26	2271	3632			26	2045	20622			26	1879	22286		Noise 0	Moran order	TP	FP			Noise 80	Moran order	TP	FP			Noise 160	Moran order	TP	FP
		27	2269	3436			27	2030	20168			27	1858	21894			1	1963	600				1	1122	132				1	396	135
		28	2266	3241			28	2020	19751			28	1834	21521			2	2241	1695				2	1433	376				2	649	185
		29	2258	3065			29	2005	19318			29	1820	21146			3	2280	2273				3	1514	649				3	740	265
		30	2254	2908			30	1991	18926			30	1801	20760			4	2265	2540				4	1564	931				4	834	383
		31	2248	2777			31	1982	18460			31	1785	20420			5	2260	2679				5	1554	1163				5	896	504
		32	2244	2634			32	1971	18067			32	1774	20088			6	2253	2765				6	1560	1366				6	908	639
		33	2237	2527			33	1954	17620			33	1756	19733			7	2252	2853				7	1555	1547				7	939	781
		34	2230	2385			34	1941	17204			34	1739	19377			8	2229	2868				8	1506	1692				8	936	885
		35	2228	2264			35	1931	16827			35	1721	19000			9	2164	2832				9	1482	1791				9	923	973
		36	2221	2155			36	1922	16452			36	1711	18666			10	2141	2810				10	1475	1954				10	903	1064
		37	2215	2065			37	1910	16009			37	1695	18325
		38	2207	1987			38	1899	15603			38	1675	17996
		39	2197	1890			39	1881	15193			39	1661	17670
		40	2186	1801			40	1865	14805			40	1651	17326
		41	2177	1709			41	1851	14436			41	1628	16977			Grund truth (average of selections by human observers)
		42	2173	1644			42	1833	14066			42	1605	16652					No of pixels
		43	2160	1585			43	1823	13689			43	1595	16334			TP+FN	object	2295
		44	2150	1506			44	1808	13334			44	1576	15982				all	34304
		45	2139	1448			45	1793	12962			45	1551	15648			TN+FP	background	32009
		46	2127	1392			46	1778	12588			46	1536	15296
		47	2108	1330			47	1767	12218			47	1523	14980
		48	2089	1266			48	1754	11896			48	1508	14673
		49	2076	1215			49	1739	11552			49	1489	14357
		50	2063	1161			50	1726	11238			50	1473	14062
		51	2047	1105			51	1711	10916			51	1458	13783				Noise 0					Noise 80					Noise 160
		52	2034	1060			52	1700	10593			52	1441	13467					FPR	TPR thr	TPR Moran	Distance from (0,1)		FPR	TPR thr	TPR Moran	Distance from (0,1)		FPR	TPR thr	TPR Moran	Distance from (0,1)
		53	2024	1001			53	1688	10268			53	1418	13200				25	0.11981	0.990414		0.120193	25	0.657784	0.896296		0.665908	25	0.708926	0.825708		0.730036
		54	2007	958			54	1670	9971			54	1397	12883				50	0.036271	0.898911		0.107399	50	0.351089	0.75207		0.429805	50	0.439314	0.64183		0.566818
		55	1996	916			55	1655	9672			55	1379	12597				75	0.0130588	0.74902		0.25132	75	0.153238	0.570806		0.455729	75	0.239401	0.437473		0.611351
		56	1974	872			56	1635	9388			56	1356	12342			threshold	100	0.00549845	0.606972		0.393067	100	0.0542972	0.399129		0.60332	100	0.110656	0.274074		0.734311
		57	1963	838			57	1613	9113			57	1331	12050				125	0.00231185	0.486275		0.513731	125	0.015152	0.261438		0.738718	125	0.0440814	0.155991		0.845159
		58	1949	810			58	1599	8850			58	1302	11740				150	0.000905995	0.384749		0.615251	150	0.00346777	0.153377		0.84663	150	0.0152457	0.0771242		0.923002
		59	1939	767			59	1584	8582			59	1291	11480				175	0.000437377	0.300218		0.699782	175	0.000624824	0.0714597		0.928541	175	0.00428005	0.0265795		0.97343
		60	1923	741			60	1563	8287			60	1279	11208				200	0.000187447	0.237037		0.762963	200	0.000156206	0.0331155		0.966885	200	0.00134337	0.0087146		0.991286
		61	1912	708			61	1545	8029			61	1257	10941				225	9.37236e-05	0.183007		0.816993	225	6.24824e-05	0.0104575		0.989542	225	0.000343653	0.00392157		0.996078
		62	1895	685			62	1526	7793			62	1244	10704				1	0.0187447		0.855338	0.145872	1	0.00412384		0.488889	0.511128	1	0.00421756		0.172549	0.827462
		63	1885	659			63	1506	7545			63	1225	10437				2	0.0529539		0.976471	0.057946	2	0.0117467		0.624401	0.375783	2	0.00577962		0.282789	0.717235
		64	1869	637			64	1487	7310			64	1203	10182				3	0.0710113		0.993464	0.0713114	3	0.0202755		0.659695	0.340908	3	0.00827892		0.32244	0.67761
		65	1850	621			65	1478	7069			65	1186	9944				4	0.0793527		0.986928	0.0804222	4	0.0290856		0.681481	0.319844	4	0.0119654		0.363399	0.636714
		66	1844	599			66	1456	6843			66	1169	9702			Moran	5	0.0836952		0.984749	0.0850733	5	0.0363335		0.677124	0.324914	5	0.0157456		0.390414	0.609789
		67	1833	568			67	1441	6605			67	1147	9466				6	0.086382		0.981699	0.0882992	6	0.0426755		0.679739	0.323092	6	0.0199631		0.395643	0.604687
		68	1822	538			68	1429	6370			68	1131	9208				7	0.0891312		0.981264	0.0910792	7	0.0483302		0.67756	0.326042	7	0.0243994		0.40915	0.591353
		69	1813	516			69	1411	6159			69	1113	8975				8	0.0895998		0.971242	0.0941018	8	0.0528601		0.656209	0.347831	8	0.0276485		0.407843	0.592802
		70	1793	496			70	1399	5944			70	1093	8756				9	0.0884751		0.942919	0.10529	9	0.055953		0.645752	0.35864	9	0.0303977		0.402179	0.598594
		71	1777	478			71	1383	5691			71	1075	8556				10	0.0877878		0.932898	0.110496	10	0.0610453		0.642702	0.362476	10	0.0332407		0.393464	0.607446
		72	1766	471			72	1361	5474			72	1051	8340
		73	1755	450			73	1340	5287			73	1036	8121
		74	1736	434			74	1326	5073			74	1019	7888
		75	1719	418			75	1310	4905			75	1004	7663
		76	1709	401			76	1304	4725			76	988	7470
		77	1691	385			77	1284	4536			77	968	7258
		78	1687	372			78	1272	4379			78	958	7045
		79	1670	358			79	1258	4214			79	942	6856
		80	1657	349			80	1240	4067			80	929	6650
		81	1646	327			81	1226	3919			81	915	6470
		82	1630	317			82	1212	3770			82	903	6315
		83	1620	306			83	1196	3621			83	891	6141
		84	1602	287			84	1180	3487			84	869	5954
		85	1587	276			85	1168	3357			85	853	5776
		86	1571	266			86	1147	3232			86	841	5599
		87	1561	262			87	1130	3101			87	832	5424
		88	1546	254			88	1107	2950			88	816	5257
		89	1538	238			89	1091	2826			89	794	5089
		90	1529	231			90	1072	2716			90	779	4937
		91	1513	224			91	1052	2585			91	760	4772
		92	1497	219			92	1039	2476			92	744	4623
		93	1481	213			93	1024	2375			93	725	4470
		94	1469	207			94	1011	2268			94	711	4325
		95	1456	202			95	996	2173			95	699	4182
		96	1442	192			96	976	2082			96	681	4037
		97	1435	188			97	959	1984			97	668	3877
		98	1422	186			98	954	1898			98	652	3761
		99	1405	181			99	927	1811			99	644	3646
		100	1393	176			100	916	1738			100	629	3542
		101	1377	168			101	897	1664			101	619	3416
		102	1363	164			102	881	1579			102	607	3287
		103	1354	161			103	871	1497			103	591	3168
		104	1342	152			104	856	1422			104	577	3054
		105	1329	146			105	846	1341			105	565	2963
		106	1318	141			106	836	1286			106	555	2855
		107	1311	135			107	820	1217			107	547	2757
		108	1300	132			108	811	1171			108	532	2675
		109	1289	129			109	798	1131			109	514	2589
		110	1278	125			110	783	1080			110	505	2489
		111	1268	120			111	771	1035			111	493	2416
		112	1256	114			112	762	978			112	483	2335
		113	1240	112			113	749	926			113	466	2241
		114	1232	110			114	738	887			114	454	2151
		115	1230	107			115	730	853			115	444	2048
		116	1215	103			116	715	804			116	433	1989
		117	1201	101			117	706	757			117	424	1896
		118	1187	98			118	692	724			118	413	1833
		119	1179	93			119	679	675			119	403	1760
		120	1169	90			120	664	642			120	396	1683
		121	1162	86			121	648	609			121	386	1635
		122	1151	82			122	636	571			122	375	1574
		123	1141	78			123	624	550			123	371	1524
		124	1133	75			124	612	511			124	364	1463
		125	1116	74			125	600	485			125	358	1411
		126	1109	71			126	586	455			126	347	1361
		127	1094	70			127	575	429			127	337	1307
		128	1085	66			128	566	413			128	331	1259
		129	1076	65			129	553	398			129	318	1208
		130	1063	64			130	546	381			130	310	1177
		131	1055	62			131	537	364			131	299	1121
		132	1042	60			132	527	344			132	292	1066
		133	1038	57			133	512	328			133	283	1028
		134	1024	56			134	500	307			134	275	988
		135	1017	54			135	487	287			135	270	951
		136	1005	52			136	473	263			136	262	896
		137	994	50			137	465	244			137	256	855
		138	982	46			138	452	233			138	249	816
		139	977	44			139	444	220			139	244	782
		140	967	44			140	436	207			140	231	754
		141	962	44			141	421	198			141	228	724
		142	953	42			142	412	190			142	222	689
		143	945	42			143	405	181			143	218	662
		144	936	41			144	393	171			144	211	638
		145	926	40			145	385	154			145	203	605
		146	919	36			146	378	143			146	194	584
		147	910	35			147	369	136			147	192	559
		148	900	32			148	364	126			148	189	536
		149	890	31			149	358	121			149	184	507
		150	883	29			150	352	111			150	177	488
		151	872	26			151	340	104			151	174	471
		152	864	26			152	330	95			152	166	446
		153	856	26			153	323	89			153	161	425
		154	847	24			154	313	80			154	154	404
		155	840	24			155	306	74			155	142	380
		156	829	24			156	295	71			156	140	356
		157	820	24			157	285	63			157	137	344
		158	811	24			158	281	58			158	128	334
		159	806	23			159	270	52			159	122	317
		160	797	23			160	262	49			160	120	296
		161	791	23			161	254	48			161	115	289
		162	783	21			162	248	46			162	112	277
		163	778	20			163	237	43			163	104	259
		164	770	20			164	228	42			164	98	241
		165	762	20			165	221	39			165	94	230
		166	752	20			166	216	34			166	91	219
		167	744	19			167	212	33			167	82	209
		168	740	18			168	205	31			168	80	198
		169	732	17			169	196	29			169	77	190
		170	724	16			170	191	27			170	74	179
		171	717	15			171	179	25			171	69	168
		172	706	15			172	178	24			172	68	161
		173	704	15			173	174	23			173	66	152
		174	697	15			174	170	20			174	62	143
		175	689	14			175	164	20			175	61	137
		176	684	14			176	162	19			176	59	132
		177	676	13			177	154	18			177	54	122
		178	668	13			178	146	15			178	52	117
		179	657	13			179	145	15			179	51	112
		180	649	13			180	144	15			180	50	110
		181	647	11			181	144	14			181	49	106
		182	644	11			182	140	13			182	47	103
		183	641	10			183	137	12			183	45	99
		184	634	10			184	132	11			184	42	93
		185	632	10			185	122	10			185	40	90
		186	627	8			186	120	10			186	39	88
		187	621	8			187	116	9			187	37	82
		188	618	8			188	111	9			188	36	76
		189	615	8			189	107	9			189	36	71
		190	609	7			190	105	9			190	35	67
		191	603	7			191	99	8			191	33	63
		192	601	7			192	96	7			192	31	62
		193	595	7			193	94	7			193	30	59
		194	587	6			194	92	7			194	28	54
		195	579	6			195	91	7			195	26	53
		196	571	6			196	88	7			196	24	51
		197	565	6			197	82	6			197	24	50
		198	558	6			198	81	6			198	23	46
		199	551	6			199	80	5			199	22	45
		200	544	6			200	76	5			200	20	43
		201	538	6			201	76	5			201	20	41
		202	533	6			202	74	5			202	19	38
		203	523	6			203	69	5			203	19	35
		204	518	5			204	63	5			204	17	35
		205	513	5			205	63	5			205	17	31
		206	508	5			206	59	5			206	16	28
		207	504	5			207	58	5			207	16	28
		208	501	5			208	53	5			208	16	26
		209	498	5			209	50	5			209	15	24
		210	494	5			210	47	5			210	15	22
		211	494	5			211	46	5			211	14	21
		212	488	4			212	45	5			212	14	21
		213	481	4			213	45	3			213	14	18
		214	477	4			214	42	3			214	14	18
		215	471	3			215	39	3			215	13	17
		216	468	3			216	37	3			216	13	17
		217	462	3			217	35	2			217	12	17
		218	460	3			218	34	2			218	12	17
		219	456	3			219	33	2			219	12	15
		220	452	3			220	32	2			220	12	13
		221	449	3			221	31	2			221	11	13
		222	440	3			222	28	2			222	11	13
		223	435	3			223	26	2			223	11	12
		224	428	3			224	25	2			224	11	12
		225	420	3			225	24	2			225	9	11
		226	415	3			226	23	2			226	8	11
		227	410	3			227	19	2			227	8	11
		228	402	3			228	19	2			228	8	10
		229	396	3			229	16	2			229	8	10
		230	391	2			230	16	2			230	8	10
		231	387	2			231	15	2			231	7	10
		232	380	2			232	14	2			232	7	8
		233	376	2			233	14	2			233	6	8
		234	369	2			234	12	1			234	6	6
		235	365	1			235	12	1			235	6	4
		236	360	1			236	12	1			236	6	4
		237	353	1			237	12	1			237	6	4
		238	349	1			238	11	1			238	6	4
		239	345	1			239	11	1			239	6	4
		240	340	34048			240	10	1			240	6	4
		241	331	34048			241	10	34048			241	6	3
		242	327	34048			242	8	34048			242	6	3
		243	321	34048			243	8	34048			243	6	3
		244	317	34048			244	8	34048			244	6	1
		245	309	34048			245	7	34048			245	6	1
		246	301	34048			246	7	34048			246	6	1
		247	295	34048			247	7	34048			247	6	1
		248	287	34048			248	7	34048			248	5	1
		249	283	34048			249	7	34048			249	3	1
		250	274	34048			250	6	34048			250	3	1
		251	271	34048			251	6	34048			251	3	1
		252	264	34048			252	6	34048			252	3	1
		253	259	34048			253	4	34048			253	3	1
		254	247	34048			254	3	34048			254	3	1
		255	243	34048			255	3	34048			255	3	1
		256	241	34048				2	34048			256	3	1
