# Supplementary material for: A novel image segmentation method based on spatial autocorrelation identifies A-type potassium channel clusters in the thalamus
Source: eLife. 2024 Dec 10;12:RP89361. doi: 10.7554/eLife.89361 (PMC11630814; doi:10.7554/eLife.89361)
Supplement: Figure 4—source data 1. [file elife-89361-fig4-data1.xlsx]

## Sheet: Sheet1
	Minor diameter of the dendrite	All elements	RL-recipient elements	Proportion of RL-recipient elements	Sum membrane length (um)	All silver particles (shaft + spine)	Density (sum silver particles/ membrane length)
	0.0 to 0.2	0	0		0	0
	0.2 to 0.4	12	0	0	22.94	2	0.087184
	0.4 to 0.6	40	0	0	108.716	11	0.101181
	0.6 to 0.8	51	0	0	180.54	12	0.0664673
	0.8 to 1.0	20	1	0.05	94.456	6	0.0635216
	1.0 to 1.2	18	3	0.166667	104.975	17	0.161943
	1.2 to 1.4	3	2	0.666667	21.111	4	0.189475
	1.4 to 1.6	2	2	1	18.577	8	0.43064
	1.6 to 1.8	4	4	1	38.201	14	0.366483
	1.8 to 2.0	3	3	1	25.244	5	0.198067
	2.0 to 2.2	1	1	1	17.327	5	0.288567
	2.2 to 2.4	2	2	1	29.228	13	0.444779
	2.4 to 2.6	0	0		0	0
	2.6 to 2.8	2	2	1	23.975	7	0.291971
	2.8 to 3.0	1	1	1	11.399	8	0.701816
	3.0 to 3.2	1	0	0	14.1	3	0.212766
	soma	1	1	1	19.939	3	0.150459
	sum	161	22		730.728	118
	Minor diameter of the dendrite	All elements	RL-recipient elements	Proportion of RL-recipient elements	Sum membrane length (um)	All silver particles (shaft + spine)	Density (all silver particles/ membrane length)
	< 0.4	12	0	0	22.94	2	0.087184
	0.4 - 0.8	91	0	0	289.256	23	0.0795143
	0.8 - 1.2	38	4	0.105263	199.431	23	0.115328
	1.2 - 1.6	5	4	0.8	39.688	12	0.302358
	1.6 - 2.0	7	7	1	63.445	19	0.299472
	> 2.0	8	7	0.875	115.968	39	0.3363
	szum	161	22		730.728	118
