# Supplementary material for: A novel image segmentation method based on spatial autocorrelation identifies A-type potassium channel clusters in the thalamus
Source: eLife. 2024 Dec 10;12:RP89361. doi: 10.7554/eLife.89361 (PMC11630814; doi:10.7554/eLife.89361)
Supplement: Figure 5—source data 1. [file elife-89361-fig5-data1.xlsx]

## Sheet: Sheet1
19_6_10	Area Kv_coloc	Area Kv_noncoloc	20_6_9	Area Kv_coloc	Area Kv_noncoloc	21_6_10	Area Kv_coloc	Area Kv_noncoloc		19_6_10	Intensity Kv_coloc	Intensity Kv_noncoloc	20_6_9	Intensity Kv_coloc	Intensity Kv_noncoloc	21_6_10	Intensity Kv_coloc	Intensity Kv_noncoloc
	64.85	9.785		79.265	9.828		164.623	20.9			707.899	1095.11		1381.48	967.878		880.556	630.156		Average			Area	Intensity							Size bins						Size bins
	64.85	8.841		79.265	8.283		164.623	17.595			707.899	858.534		1381.48	1214.98		880.556	902.854						Kv_noncoloc	Kv_coloc					Area Kv_noncoloc		19_6_10	20_6_9	21_6_10		Intensity Kv_noncoloc		19_6_10	20_6_9	21_6_10
	64.85	8.369		61.884	7.682		164.623	16.994			707.899	205.087		1397.43	1121.12		880.556	726.061				19_6_10	0.862143	666.828							0	795	910	898			400	124	91	299
	64.678	6.91		61.884	7.253		164.623	13.347			708.907	745.708		1397.43	607.272		880.556	651.293				20_6_9	0.781941	700.579							1	258	187	252			500	244	202	331
	64.678	6.695		61.884	6.695		164.623	12.059			708.907	1120.41		1397.43	1123.41		880.556	723.456				21_6_10	1.04042	559.386							3	36	31	59			600	464	534	368
	61.374	5.751		51.069	6.609		164.623	11.501			1353.67	783.366		1663.51	674.799		880.556	743.623				19_6_10	10.3632		938.043						5	10	16	30			800	113	145	50
	61.374	5.322		51.069	6.48		158.486	11.458			1353.67	833.702		1663.51	675.907		898.888	618.652				20_6_9	9.28833		1026.71						10	0	0	7			900	54	67	23
	58.584	5.236		51.069	6.309		158.486	11.158			1385.11	967.869		1663.51	929.857		898.888	667.438				21_6_10	16.813		731.716						20	0	0	1			1000	31	29	6
	58.584	5.064		49.181	6.223		158.486	9.699			1385.11	847.585		1377.31	969.772		898.888	635.004													50	0	0	0			1100	21	41	3
	58.584	5.064		49.181	6.223		158.486	9.441			1385.11	866.297		1377.31	697.441		898.888	961.2													500	0	0	0			10000
	58.584	4.893		48.923	5.922		158.486	8.969			1385.11	746.57		1382.79	1036.9		898.888	599.493		SD			Area	Intensity							1000
	58.584	4.85		48.709	5.364		158.486	8.883			1385.11	647.088		1414.36	890.328		898.888	686.222						Kv_noncoloc	Kv_coloc
	56.867	4.764		46.263	5.364		132.737	8.025			956.523	702.414		1618.03	1321.38		1004.45	683.225				19_6_10	1.00851	177.402
	56.867	4.721		46.263	5.236		132.737	7.982			956.523	865.391		1618.03	700.287		1004.45	816.086				20_6_9	1.02571	183.163
	56.867	4.635		45.791	5.107		132.737	7.896			956.523	700.296		1631.3	1113.5		1004.45	541.739				21_6_10	1.7025	153.683							Size bins						Size bins
	56.867	4.506		45.748	5.021		132.737	7.682			956.523	645.476		933.597	925.103		1004.45	484.346				19_6_10	12.2524		269.522					Area Kv_coloc		19_6_10	20_6_9	21_6_10		Intensity Kv_coloc		19_6_10	20_6_9	21_6_10
	53.477	4.506		40.383	4.849		98.362	7.253			994.195	777.771		832.556	944.991		1052.86	491.308				20_6_9	10.9042		284.471						0	103	92	115			400	14	4	65
	53.477	4.506		39.139	4.849		98.362	7.124			994.195	794.229		841.533	815.319		1052.86	885.241				21_6_10	27.1046		199.083						1	191	166	141			500	43	13	120
	50.987	4.464		38.967	4.592		97.89	6.952			822.314	990.558		1180.85	629.589		807.869	771.858													3	143	88	92			600	238	145	351
	50.987	4.249		38.967	4.463		97.89	6.909			822.314	969.162		1180.85	812.298		807.869	734.242													5	176	127	146			800	161	112	134
	50.987	4.249		38.838	4.334		97.89	6.781			822.314	696.99		1183.3	828.396		807.869	654.544													10	165	160	148			900	128	105	62
	50.987	4.206		38.238	4.249		94.156	6.738			822.314	654.143		1170.89	736.788		1050.62	925.051													20	124	79	123			1000	104	76	42
	50.987	4.077		38.238	4.249		89.393	6.609			822.314	1034.82		1170.89	1205.9		841.074	758.195													50	24	8	63			1100	230	263	34
	50.987	4.034		38.238	4.163		89.393	6.48			822.314	919.596		1170.89	844.701		841.074	518.993													500	0	0	0			10000
	47.125	3.82		36.864	4.077		89.393	6.394			876.522	790.551		1425.28	1213.72		841.074	808.732													1000
	47.125	3.82		36.864	3.948		89.393	6.351			876.522	816.315		1425.28	727.467		841.074	653.108
	47.125	3.82		32.83	3.905		89.393	6.223			876.522	629.382		1672.73	873.912		841.074	555.414
	45.923	3.734		32.83	3.862		89.393	6.223			1164.47	1033.86		1672.73	1016.01		841.074	732.441
	45.923	3.734		32.701	3.862		89.393	6.223			1164.47	1067.23		1287.59	746.178		841.074	501.097
	45.923	3.734		32.701	3.819		89.393	5.622			1164.47	666.011		1287.59	701.382		841.074	536.672
	45.923	3.605		32.358	3.691		88.878	5.536			1164.47	1189.74		1215.48	844.558		843.465	583.682
	45.923	3.476		32.358	3.691		88.878	5.536			1164.47	886.173		1215.48	579.698		843.465	471.07
	39.228	3.476		32.101	3.519		83.213	5.364			840.368	680.086		1221.39	702.634		928.084	810.584
	39.228	3.476		32.101	3.476		83.213	5.364			840.368	576.309		1221.39	927.296		928.084	723.44
	38.541	3.391		32.101	3.476		83.213	5.364			1081.57	637.57		1221.39	801.951		928.084	555.448
	38.541	3.348		31.757	3.433		80.724	5.364			1081.57	899.103		1300.41	1008.83		946.381	504.704
	37.983	3.348		30.47	3.39		80.724	5.107			1089.63	753.385		1395.65	738.937		946.381	592.756
	37.983	3.348		30.47	3.262		80.724	5.064			1089.63	803.346		1395.65	909.171		946.381	717.288
	37.983	3.262		30.427	3.219		75.617	4.978			1089.63	1245.21		1018.1	973.24		850.381	731.259
	37.983	3.219		30.341	3.219		75.617	4.892			1089.63	713.84		1018.98	1461.67		850.381	517.614
	37.983	3.133		30.341	3.176		75.617	4.849			1089.63	920.521		1018.98	669.311		850.381	581
	37.94	3.09		30.255	3.176		75.617	4.849			849.99	590.125		1414.04	1039.95		850.381	573.788
	37.253	3.047		30.255	3.133		68.493	4.764			1134.63	1057.46		1414.04	714.493		721.581	522.117
	37.253	3.047		30.127	3.09		68.493	4.678			1134.63	744.521		1418.9	710.347		721.581	724.165
	36.266	3.004		29.655	3.047		68.493	4.678			718.672	874.314		827.764	604.183		721.581	622.78
	36.266	3.004		29.569	3.047		68.493	4.635			718.672	950.886		1125.62	1167.96		721.581	644.204
	36.266	2.918		29.569	3.004		67.334	4.506			718.672	688.529		1125.62	757.629		724.533	675.752
	35.708	2.918		29.569	2.961		67.334	4.463			722.041	350.603		1125.62	1050.03		724.533	742.038
	34.206	2.876		29.397	2.918		64.158	4.334			807.836	750.821		1129.75	762.985		875.886	908.168
	34.206	2.876		29.397	2.918		64.158	4.334			807.836	636.134		1129.75	1067.47		875.886	508.366
	32.532	2.876		29.225	2.918		64.158	4.292			1126.25	599.537		1109.51	933.338		875.886	392.23
	32.532	2.876		27.123	2.875		64.158	3.991			1126.25	589.881		892.869	1062.98		875.886	730.602
	32.532	2.747		27.037	2.875		61.111	3.991			1126.25	1085.91		891.533	959.672		776.264	531.71
	32.532	2.747		26.178	2.875		56.949	3.948			1126.25	880.25		1856.37	660.239		897.999	649.424
	32.532	2.747		24.848	2.832		56.949	3.905			1126.25	765.375		1133.28	842.652		897.999	626.681
	32.103	2.747		24.848	2.789		56.219	3.862			847.182	707.984		1133.28	954.323		769.098	754.6
	32.103	2.747		24.848	2.747		56.219	3.862			847.182	670.438		1133.28	790.062		769.098	638.722
	32.103	2.704		24.161	2.747		54.331	3.819			847.182	778.413		1395.12	882.094		833.42	760.899
	32.103	2.704		24.161	2.704		54.331	3.819			847.182	774.016		1395.12	638.016		833.42	705.202
	32.103	2.704		24.161	2.704		54.331	3.819			847.182	642.73		1395.12	669		833.42	570.989
	32.103	2.661		24.076	2.661		54.331	3.819			847.182	818.919		1399.19	774.21		833.42	583.494
	32.103	2.661		24.076	2.618		52.7	3.777			847.182	466.323		1399.19	1041.64		1019.77	792.523
	32.103	2.618		23.303	2.618		52.7	3.691			847.182	545.984		1317.96	676.492		1019.77	712.221
	31.502	2.575		22.702	2.575		48.881	3.691			1216.42	783.05		936.217	797.033		696.2	558.244
	31.502	2.575		22.101	2.575		48.881	3.648			1216.42	616.767		1305.35	611.583		696.2	594.918
	31.502	2.532		22.101	2.575		48.881	3.648			1216.42	761.186		1305.35	617.05		696.2	947.506
	30.858	2.532		21.801	2.532		48.881	3.648			1135.22	760.847		1202.28	932.542		696.2	673.894
	30.858	2.532		21.672	2.489		48.881	3.648			1135.22	704.712		1255.88	762.328		696.2	607.612
	30.858	2.489		21.114	2.489		47.979	3.648			1135.22	739.759		1110.53	562.931		699.162	537.929
	30.816	2.489		21.029	2.489		47.979	3.605			1166.2	711.897		939.906	1336.41		699.162	729.548
	30.816	2.446		21.029	2.489		47.979	3.562			1166.2	1097		939.906	547.034		699.162	598.976
	30.816	2.403		21.029	2.446		47.979	3.519			1166.2	768.982		939.906	602		699.162	1215.95
	30.773	2.403		21.029	2.446		45.748	3.519			1231.53	616.429		939.906	471.053		788.725	590.39
	30.773	2.403		21.029	2.446		45.748	3.476			1231.53	567.482		939.906	829.912		788.725	610.741
	30.773	2.318		20.943	2.403		45.662	3.433			1231.53	840.056		1276.94	1191.41		670.411	926.225
	30.773	2.318		20.814	2.403		45.662	3.39			1231.53	959.5		1446.06	714.304		670.411	975.544
	30.73	2.275		20.814	2.36		44.761	3.347			1138.65	864.226		1033.21	792.455		714.928	779.782
	30.515	2.275		20.814	2.36		44.761	3.347			864.114	1114.04		1033.21	756.345		714.928	785.013
	30.515	2.275		20.642	2.36		44.761	3.347			864.114	873.132		1037.53	958.382		714.928	682.295
	30.472	2.275		20.385	2.36		44.761	3.262			970.638	702.849		827.493	660.964		714.928	507.895
	30.472	2.232		20.385	2.317		44.718	3.262			970.638	788.577		827.493	773.13		942.79	678.263
	30.472	2.232		20.385	2.189		44.718	3.219			970.638	1070.37		975.501	591.843		960.611	687.053
	30.429	2.232		20.385	2.189		44.374	3.219			970.677	456.058		827.493	706.078		945.747	764.947
	30.429	2.189		20.213	2.189		43.259	3.219			970.677	947.176		980.854	721.471		1234.22	690.52
	30.429	2.189		20.213	2.103		43.259	3.219			970.677	694.039		980.854	868.735		1234.22	462.827
	30.429	2.146		20.213	2.103		43.259	3.176			970.677	651.52		980.854	739.878		976.435	326.405
	28.541	2.146		20.041	2.06		43.259	3.176			1202.26	941.36		1579.75	815.167		976.435	552.459
	28.541	2.103		19.999	2.06		43.13	3.133			1202.26	945		1725.64	1189.08		803.609	662.041
	27.983	2.103		19.569	2.06		42.143	3.133			1092.05	676.633		1468.74	667.271		697.076	523.027
	27.897	2.103		19.526	2.017		42.143	3.133			1236.31	617.347		988.374	737.809		697.076	551.877
	27.253	2.103		19.484	2.017		41.971	3.133			935.841	661.653		1091.28	758.404		848.892	697.151
	27.253	2.103		19.484	2.017		40.898	3.133			935.841	668.102		1091.28	410.234		807.34	733.836
	25.837	2.06		19.484	2.017		39.654	3.09			826.339	963.229		1091.28	953.383		796.037	503.361
	25.708	2.06		19.484	1.974		39.439	3.047			939.098	1502.08		1091.28	691.435		798.084	1267.14
	25.365	2.06		19.183	1.931		39.439	3.047			1262.4	806.229		794.362	1282.96		798.084	833.268
	25.322	2.06		18.797	1.931		37.122	3.004			1283.71	631.792		959.991	791.311		837.082	772.443
	25.322	2.06		18.668	1.888		37.122	3.004			1283.71	785.812		1316.86	997.659		837.082	620.3
	25.322	2.017		18.668	1.888		37.122	2.961			1283.71	603.83		1316.86	1051.95		837.082	411.304
	25.279	2.017		18.325	1.888		37.122	2.961			1265.64	777.787		800.068	635.432		837.082	429.435
	25.022	2.017		18.325	1.845		36.907	2.918			1142.8	708.234		800.068	810.512		730.356	480.088
	24.807	2.017		18.153	1.845		36.907	2.875			1148.32	534.681		1345.5	716.233		730.356	591.328
	23.906	2.017		18.153	1.845		36.049	2.875			921.255	480.553		1345.5	658.791		598.038	485.239
	23.906	1.974		18.153	1.802		35.448	2.832			921.255	799.348		1345.5	1113.95		678.516	959.076
	23.605	1.974		18.067	1.802		34.118	2.832			858.649	765.391		1134.11	803.524		865.781	605.53
	23.605	1.931		17.982	1.802		34.118	2.789			929.144	890.022		1270.13	934.786		865.781	721.077
	23.605	1.931		17.982	1.802		33.86	2.789			929.144	880.956		1270.13	1110.93		955.229	657.892
	23.605	1.931		17.638	1.802		33.86	2.789			929.144	749.533		764.168	939.524		955.229	665.369
	23.605	1.931		17.595	1.802		33.302	2.747			929.144	825.933		1329.12	811.024		752.941	642.203
	23.519	1.888		17.424	1.802		33.302	2.747			860.847	242.5		1348.63	800.619		752.941	741.094
	23.262	1.888		17.209	1.802		33.302	2.747			1087.26	691.614		1332.46	569.405		752.941	752.547
	23.262	1.845		17.209	1.76		32.873	2.747			943.97	881.86		952.623	652.707		984.07	546.297
	23.262	1.845		17.209	1.76		32.358	2.704			1087.26	770.977		1332.46	1106.63		872.976	620.635
	23.262	1.845		17.166	1.76		32.358	2.704			943.97	1228.84		1253.87	800.098		872.976	504.333
	23.262	1.845		17.166	1.76		32.358	2.661			943.97	870.651		1253.87	894.878		872.976	862.387
	23.262	1.845		17.123	1.717		32.358	2.661			1087.26	1049.07		2084.02	609.125		872.976	305.145
	22.833	1.845		17.037	1.674		32.015	2.618			922.241	770.302		974.839	673.462		797.205	499.82
	22.833	1.845		16.994	1.674		32.015	2.618			922.241	610.651		1260.63	939.487		797.205	618.721
	22.79	1.845		16.909	1.674		31.714	2.618			1003.99	610.837		1052.92	558.333		829.202	620.295
	22.704	1.845		16.78	1.674		30.341	2.618			925.312	526.279		1058	726.103		1278.32	687.016
	22.404	1.803		16.437	1.674		30.341	2.618			1109.16	1249.93		1352.03	832		812.891	489.049
	22.318	1.803		16.351	1.631		30.341	2.618			977.892	812.119		1380.6	1088.71		812.891	500.885
	22.06	1.803		16.222	1.631		30.341	2.575			1103.68	739.071		1316.51	614.263		812.891	1073.9
	22.06	1.803		16.179	1.631		30.341	2.575			1103.68	720.214		815.732	760.684		812.891	707.233
	21.974	1.803		16.136	1.588		29.612	2.575			1098.17	616.238		815.729	1021.68		654.209	698.15
	21.974	1.76		16.093	1.588		29.612	2.532			1098.17	1071.51		1021.76	887.243		654.209	974.051
	21.974	1.76		16.093	1.588		29.612	2.489			1098.17	726.707		1021.76	867.432		654.209	505.19
	21.974	1.76		15.621	1.588		29.612	2.489			1098.17	775.024		1375.88	885.378		654.209	695.569
	21.974	1.76		15.621	1.588		29.569	2.446			1098.17	750.22		1375.88	1175.62		1210.11	692
	21.974	1.76		15.621	1.588		29.569	2.446			1098.17	746.732		1375.88	748		1210.11	792.333
	21.846	1.76		15.578	1.545		29.569	2.446			1122.56	944.268		964.81	758.972		1210.11	467.789
	21.846	1.76		15.578	1.545		29.569	2.403			1122.56	568.561		964.81	660.778		1210.11	758.75
	21.803	1.76		15.535	1.545		29.526	2.403			1103.08	540.244		1243.43	750.278		802.68	547.643
	21.717	1.717		15.492	1.545		29.526	2.403			1158.49	828.675		999.457	573.083		802.68	537.982
	21.717	1.717		15.492	1.502		29.354	2.36			1158.49	831.025		798.693	634.143		650.294	483.982
	21.073	1.717		15.492	1.502		29.182	2.36			1218.18	786.575		798.693	311.571		1009.89	596.909
	20.944	1.717		15.278	1.502		29.182	2.36			893.99	730.975		1169.64	829.714		1009.89	492.491
	20.858	1.717		15.235	1.502		29.182	2.317			1223.96	814.95		1464.54	765.057		1009.89	464.315
	20.687	1.717		15.235	1.502		28.582	2.275			872.963	783.275		1464.54	882.971		1041.19	619.755
	20.515	1.717		15.235	1.459		28.582	2.232			1613.68	763.075		1464.54	769.853		1041.19	652.673
	20.472	1.717		15.235	1.459		28.582	2.232			1464.85	760.45		806.608	986.206		1041.19	562.212
	20.472	1.717		14.591	1.459		27.552	2.232			1464.85	721.95		1274.04	602.029		1034.01	457.231
	20.472	1.674		14.591	1.459		27.423	2.189			1464.85	1107.67		935.447	1384.44		1048.6	614.157
	20.429	1.674		14.591	1.459		27.423	2.189			1013.78	821		935.447	801.382		1048.6	548.255
	20.429	1.674		14.548	1.459		27.294	2.189			1013.78	671.026		919.192	759.794		669.61	431.765
	20.386	1.674		14.462	1.459		27.294	2.146			1287.19	614.436		1414.95	679.353		669.61	609.36
	20.343	1.631		14.462	1.459		27.165	2.146			1472.11	927.526		1520.31	660.5		968.422	612.66
	20.343	1.631		14.377	1.416		26.436	2.103			1472.11	595.211		1064.3	534.545		796.904	869.184
	20.3	1.631		14.334	1.416		26.436	2.103			1290.47	587.395		1767.56	713.818		796.904	588.898
	19.528	1.631		14.248	1.416		26.093	2.103			776.316	678.553		1776.33	976.939		802.567	748.633
	19.528	1.631		14.248	1.416		25.792	2.06			776.316	566.658		1776.33	971.758		1381.98	616.917
	19.528	1.588		14.162	1.373		25.663	2.06			776.316	891.865		859.291	754.688		722.278	834.271
	19.528	1.588		14.076	1.373		25.234	2.06			776.316	622.892		1196.84	728.062		1069.91	660.896
	19.356	1.588		14.076	1.373		25.02	2.06			779.466	783		1196.84	627.062		768.007	466.458
	19.099	1.588		14.076	1.373		25.02	2.06			1541.88	726.622		1196.84	782.562		768.007	519.479
	19.056	1.588		14.076	1.373		24.891	2.06			894.874	770.378		1196.84	1256.12		661.705	419.646
	18.841	1.588		13.99	1.373		24.505	2.06			1156.42	821.324		928.733	707.312		789.067	479.979
	18.841	1.545		13.99	1.373		24.505	2.06			1322.03	1165.61		928.733	1199.22		789.067	497.25
	18.841	1.545		13.947	1.373		23.861	2.017			1322.03	752.333		1201.25	1268.84		984.585	702.426
	18.841	1.545		13.776	1.373		23.861	2.017			1322.03	1186.53		968.776	574.938		984.585	526
	18.283	1.545		13.733	1.33		23.732	1.974			1335.91	646.028		940.694	486.871		849.74	809.391
	18.24	1.545		13.733	1.33		23.346	1.974			1132.02	533.75		940.694	772.742		958.585	430.022
	18.026	1.545		13.733	1.33		23.346	1.974			1457.85	699.306		940.694	660.452		958.585	850.022
	18.026	1.545		13.69	1.33		23.303	1.974			1457.85	738.667		973.1	1137.13		1154.84	463.935
	17.897	1.502		13.561	1.33		23.303	1.974			1364.07	1159.69		2008.18	860.29		1154.84	508.696
	17.897	1.502		13.518	1.33		23.303	1.974			889.604	823.314		1092.17	610.645		1154.84	481.391
	17.897	1.502		13.518	1.287		23.217	1.931			889.604	622.314		1092.17	653.5		736.73	834.089
	17.682	1.502		13.475	1.287		23.217	1.888			814.65	766.714		1172.83	599.067		736.73	706.068
	17.64	1.502		13.433	1.287		22.273	1.888			1131.91	956.771		1262.16	892.967		615.592	499.091
	17.64	1.502		13.39	1.287		21.715	1.888			1131.91	1009.6		1243.52	1062.33		605.344	572.705
	17.468	1.502		13.347	1.287		21.715	1.888			1383.1	825.371		1170.66	654.5		605.344	719.864
	17.468	1.502		13.304	1.287		21.715	1.845			832.892	508.429		1272.31	688.067		605.344	665.419
	17.468	1.502		13.218	1.287		21.629	1.845			1383.1	520.429		949.688	970.367		897.75	690.256
	17.468	1.502		13.132	1.287		21.629	1.845			1383.1	589.314		954.245	1083.77		897.75	712.86
	17.167	1.459		13.089	1.245		21.629	1.845			1023.38	695.882		963.649	552.103		897.75	495.047
	17.167	1.459		12.96	1.245		21.501	1.845			1023.38	975.618		1450.34	700.483		892.383	627
	17.167	1.459		12.746	1.245		21.501	1.845			1062.16	725.618		1259	1124.72		892.383	535.605
	17.167	1.459		12.703	1.245		21.372	1.802			1062.16	591.794		1329.17	314.793		892.56	538.048
	17.167	1.459		12.703	1.245		21.372	1.802			1062.16	596.353		1425.92	752.483		892.56	857.429
	17.167	1.416		12.66	1.245		21.372	1.802			1023.38	652.424		1476.23	811.414		892.56	326.143
	17.082	1.416		12.617	1.245		21.372	1.802			940.291	275.545		1012.13	933.517		892.56	535.595
	16.867	1.416		12.617	1.202		20.685	1.802			678.746	492.394		1486.49	738.214		1085.19	521.048
	16.867	1.416		12.617	1.202		20.17	1.802			678.746	722.273		1012.13	983.107		524.172	521.429
	16.867	1.416		12.445	1.202		20.17	1.76			678.746	878.97		1236.21	714.821		524.172	477.78
	16.867	1.416		12.403	1.202		20.17	1.76			678.746	655.545		1213.21	1191.57		732.766	766.951
	16.824	1.416		12.403	1.202		20.17	1.76			1035.21	444.818		1195.79	902.429		524.172	548.244
	16.824	1.416		12.403	1.202		20.17	1.76			1035.21	427.424		1213.21	950.857		524.172	522.049
	16.567	1.416		12.403	1.202		19.999	1.76			1630.24	567.121		986.408	799.536		526.657	540.195
	16.481	1.416		12.36	1.202		19.913	1.76			829.039	521.333		1112.75	959.964		954.269	616.415
	16.481	1.416		12.36	1.202		19.913	1.76			829.039	677.121		1087.3	1032.93		954.269	604.463
	16.395	1.416		12.36	1.159		19.87	1.76			1260.51	636.091		988.58	948.704		752.529	406.049
	16.309	1.373		12.317	1.159		19.87	1.76			1347.51	994.969		1575.06	655.852		752.529	486.805
	16.309	1.373		12.317	1.159		19.827	1.76			1347.51	788.812		1484.11	917.185		957.167	461.61
	16.309	1.373		12.317	1.159		19.784	1.717			1347.51	861.031		1484.11	1102.82		667.041	874.05
	16.009	1.373		12.317	1.159		19.784	1.717			1419.44	715.562		1484.11	609.148		1155.41	509.975
	16.009	1.373		12.188	1.159		19.698	1.717			1419.44	668.969		1051.04	794.185		772.614	601.825
	15.966	1.373		12.188	1.159		19.526	1.717			1104.46	882.812		871.799	546.481		927.653	493.175
	15.966	1.373		12.016	1.159		19.269	1.717			770.153	686.062		1785.14	627.148		709.02	617.45
	15.923	1.373		12.016	1.116		19.183	1.717			1120.68	838.719		1785.14	709.423		524.729	714.675
	15.923	1.373		11.802	1.116		19.183	1.674			1120.68	718.656		1479.43	618.577		524.729	475.59
	15.923	1.373		11.759	1.116		19.183	1.674			1120.68	598.906		996.161	627.808		524.729	635.179
	15.923	1.373		11.587	1.116		19.011	1.674			1120.68	504.312		895.504	694.231		629.777	594
	15.88	1.373		11.544	1.116		19.011	1.631			771.489	807.188		1041.73	712.615		629.777	787.053
	15.665	1.373		11.373	1.116		18.926	1.631			720.288	698.281		1531.36	813.346		618.676	799.474
	15.665	1.33		11.287	1.116		18.926	1.631			720.288	842.548		1724.43	768.538		618.676	581.053
	15.622	1.33		11.287	1.116		18.926	1.631			1740.98	584.258		1724.43	428.769		618.676	437.026
	15.622	1.33		11.201	1.116		18.883	1.631			1740.98	580.71		730.165	729.808		619.336	932.711
	15.622	1.33		11.201	1.116		18.454	1.631			1740.98	423.258		956.015	651.423		743.826	798.895
	15.622	1.33		11.201	1.073		18.454	1.631			891.629	660.29		956.015	604.8		743.826	622.711
	15.622	1.33		11.158	1.073		18.411	1.631			1740.98	783.645		1074.86	721.96		688.594	585.289
	15.579	1.288		11.158	1.073		18.325	1.631			706.391	856.333		934.662	597		567.354	528.447
	15.579	1.288		11.158	1.073		18.239	1.631			706.391	540.2		1074.86	738.68		1169.34	394.447
	15.579	1.288		11.072	1.073		18.153	1.588			706.391	707.3		1079.7	831.68		692.52	722.108
	15.579	1.288		11.029	1.073		18.067	1.588			706.391	589.8		792.961	806.24		1209.56	754.459
	15.579	1.288		11.029	1.073		17.853	1.588			706.391	959.467		792.961	660.2		1218.69	691.378
	15.494	1.288		10.986	1.073		17.767	1.588			1382.66	788.5		1075.25	849.56		645.553	361.811
	15.322	1.288		10.943	1.073		16.952	1.588			729.504	929.467		809.467	770.28		716.605	521.865
	15.236	1.288		10.943	1.073		16.952	1.588			1053.72	968.967		1212.69	698.48		716.605	480.459
	15.107	1.288		10.858	1.073		16.952	1.588			1032.85	462.833		1524.17	833.88		716.605	435.27
	15.064	1.288		10.858	1.073		16.952	1.588			1365.65	828.133		851.51	978.52		716.605	496.054
	15.064	1.288		10.858	1.073		16.909	1.588			1365.65	573		1210.5	831		769.071	447.027
	14.85	1.288		10.858	1.073		16.694	1.588			1316.9	672.333		1278.8	566.56		784.013	566.676
	14.85	1.288		10.858	1.073		16.694	1.588			1316.9	753		1278.8	800.56		784.013	292.27
	14.721	1.288		10.858	1.03		16.694	1.545			1079.36	756.567		851.51	631.25		784.013	775.722
	14.721	1.288		10.858	1.03		16.651	1.545			1406.42	538.7		1278.8	612.083		785.405	709.25
	14.721	1.288		10.858	1.03		16.651	1.545			1406.42	774.467		844.368	667		999.946	948.611
	14.549	1.288		10.858	1.03		16.651	1.545			948.348	706.1		1278.8	833.833		999.946	892.111
	14.292	1.288		10.815	1.03		16.565	1.545			1155.56	630.467		1282.14	654.667		837.832	542.944
	14.292	1.288		10.772	1.03		16.394	1.545			1155.56	561.967		1183.33	1200.38		728.065	533.333
	14.292	1.245		10.772	1.03		16.394	1.545			1155.56	835.552		1183.33	887.792		728.065	552.361
	14.206	1.245		10.772	1.03		16.308	1.545			704.743	800.724		1183.33	724.167		873.139	484.528
	14.206	1.245		10.729	1.03		16.308	1.545			704.743	1083.83		850.844	663.625		966.987	443.639
	14.034	1.245		10.729	1.03		16.179	1.502			796.312	1024.17		850.844	914.458		1091.73	726.429
	13.949	1.245		10.729	1.03		15.707	1.502			1364.97	834.862		850.844	859.333		610.445	529.143
	13.949	1.245		10.686	1.03		15.578	1.502			955.634	604.793		1543.72	737.083		709.904	694.429
	13.863	1.245		10.643	0.987		15.578	1.502			1673.18	522.655		710.492	536.826		1010.86	537.029
	13.863	1.245		10.386	0.987		15.578	1.502			1673.18	786.172		1283.19	725.478		709.904	489.114
	13.863	1.245		10.386	0.987		15.578	1.502			1673.18	618.621		1091.22	556.609		1010.86	576.771
	13.605	1.245		10.386	0.987		15.364	1.502			1154.03	674.103		1091.22	558.565		713.986	528.457
	13.562	1.245		10.257	0.987		15.278	1.459			1358.85	794.103		1202.42	746.087		715.829	814.5
	13.562	1.245		10.257	0.987		15.235	1.459			1341.13	671.724		1101.96	698.913		1117.84	805.324
	13.562	1.245		10.257	0.987		15.192	1.459			1341.13	512.207		1138.04	736		1205.84	844.559
	13.562	1.245		10.171	0.987		15.106	1.459			1341.13	506.517		1283.03	752.652		622.628	539.059
	13.519	1.202		10.128	0.987		15.106	1.459			1361.86	675.357		830.174	624.826		622.628	711.676
	13.305	1.202		10.085	0.987		15.106	1.459			1164.1	660.929		997.098	879.87		622.628	507.794
	13.09	1.202		10.085	0.987		15.063	1.459			1202.08	798.036		997.098	843.13		792.792	607.941
	13.004	1.202		10.042	0.987		14.892	1.459			785.98	735.393		1038.85	530.826		720.844	660.059
	13.004	1.202		10.042	0.987		14.806	1.459			963.967	577.536		1038.85	736.783		836.994	389.147
	12.961	1.202		9.999	0.987		14.806	1.416			1091.24	716.286		1342.58	752.478		843.38	655.758
	12.918	1.202		9.913	0.987		14.806	1.416			1093.99	608.75		1278.57	679.913		772.559	679.758
	12.918	1.202		9.828	0.987		14.806	1.416			1093.99	483.357		1245.64	758.304		772.559	592.636
	12.876	1.159		9.828	0.987		14.806	1.416			1208.6	817.889		1245.64	648.043		772.559	606.727
	12.876	1.159		9.785	0.987		14.72	1.416			1208.6	1018.56		1362.42	815.304		1048.98	539.545
	12.79	1.159		9.742	0.987		14.677	1.373			1254.33	908.63		913.449	529.478		656.354	558.312
	12.79	1.159		9.742	0.987		14.677	1.373			1254.33	1274.48		902.965	685.217		771.678	693.562
	12.704	1.159		9.742	0.987		14.634	1.373			978.889	871.259		902.965	567.348		723.836	686.094
	12.661	1.159		9.699	0.944		14.634	1.373			680.227	760.926		1197.31	906.591		723.836	507.031
	12.661	1.159		9.656	0.944		14.634	1.33			706.766	557.481		983.071	683.091		723.836	657.548
	12.489	1.159		9.656	0.944		14.634	1.33			1038.74	846.556		1086.63	894.636		723.836	522.903
	12.446	1.159		9.656	0.944		14.634	1.33			1075.46	875.593		1103.61	872.136		658.062	529.839
	12.361	1.159		9.656	0.944		14.591	1.33			666.326	701.963		1698.91	691.818		724.247	396.323
	12.361	1.159		9.656	0.944		14.548	1.33			958.021	724.333		791.191	555.091		485.823	561.742
	12.361	1.159		9.656	0.944		14.334	1.33			958.021	742.111		791.191	1025.45		716.898	535.935
	12.318	1.159		9.656	0.944		14.162	1.33			920.077	577.333		1698.91	677.455		735.327	415.387
	12.318	1.159		9.57	0.944		14.162	1.33			920.077	592.037		1483.78	674.955		735.327	453.516
	12.318	1.159		9.57	0.944		14.162	1.33			904.031	617.667		798.865	674.773		735.327	459.516
	12.232	1.159		9.57	0.944		14.162	1.33			962.067	695.074		798.865	851.409		735.327	686.968
	12.232	1.116		9.527	0.944		13.905	1.33			962.067	723.692		1013.41	681.045		790.818	448.645
	12.232	1.116		9.484	0.944		13.819	1.33			962.067	551.192		988.593	635.455		875.416	584.903
	12.189	1.116		9.441	0.944		13.819	1.33			672.549	1092.92		1641.3	882.227		886.134	496.613
	12.06	1.116		9.184	0.944		13.733	1.287			965.979	744.423		921.724	657.182		976.997	666.133
	11.846	1.116		9.098	0.944		13.39	1.287			1529.42	716.346		820.335	620.591		682.163	665.167
	11.846	1.116		9.055	0.944		13.39	1.287			1529.42	803.077		1129.4	720.273		682.163	759.2
	11.76	1.116		9.012	0.944		13.39	1.287			1063.74	959.885		1328.83	697.409		682.163	760.3
	11.76	1.116		8.883	0.944		13.39	1.287			1063.74	919.923		1269.46	739.636		682.163	735
	11.76	1.116		8.883	0.944		13.39	1.287			1063.74	778.269		1098.12	584.682		682.163	618.333
	11.717	1.116		8.883	0.901		13.39	1.287			1006.73	908.962		1269.46	622.238		682.163	628.7
	11.631	1.116		8.841	0.901		13.347	1.287			844.173	765.038		1227.88	880.381		660.219	482.533
	11.588	1.116		8.841	0.901		13.347	1.287			1325.64	623.115		1227.88	657.333		614.932	534.833
	11.588	1.116		8.755	0.901		13.347	1.287			735.752	724.308		1429.47	633.381		614.932	494.9
	11.588	1.116		8.712	0.901		13.261	1.287			735.752	522.038		1400.59	885.048		969.757	418.5
	11.588	1.116		8.712	0.901		13.261	1.245			735.752	479.192		1217.91	707.524		969.757	655.276
	11.588	1.116		8.583	0.901		13.046	1.245			735.752	555.808		1479.93	600.952		830.072	698.345
	11.545	1.116		8.411	0.901		12.832	1.245			737.041	635.538		1098.6	1155.29		790.545	973.931
	11.502	1.116		8.411	0.901		12.832	1.245			1086.81	449.808		956	639.095		873.789	681.448
	11.502	1.073		8.368	0.901		12.832	1.245			934.015	644.32		855.872	762.714		873.789	911.138
	11.459	1.073		8.368	0.901		12.832	1.245			936.524	1157.88		855.872	1023.48		563.1	436.897
	11.288	1.073		8.283	0.901		12.789	1.245			665.589	747.36		872.041	685.524		973.688	580.586
	11.288	1.073		8.24	0.901		12.789	1.245			668.008	611.2		1668.57	722.381		760.872	661.517
	11.245	1.073		8.197	0.901		12.789	1.245			664.615	669.36		1199.33	1067.52		1058.55	422.966
	11.245	1.073		8.154	0.901		12.789	1.245			664.615	707.88		1695.6	662.476		1037.08	533.897
	11.245	1.073		8.025	0.901		12.746	1.245			664.615	853		1221.89	870.762		975.475	614.517
	11.073	1.073		7.982	0.901		12.574	1.202			1369.56	650.76		1465.91	516.095		889.256	862.143
	11.03	1.073		7.982	0.901		12.531	1.202			551.837	810.6		1211.93	1130.14		681.055	881.821
	10.987	1.073		7.982	0.901		12.445	1.202			676.766	680		841.183	738.143		428.91	611.036
	10.858	1.073		7.982	0.901		12.445	1.202			1349.7	617.76		841.183	550		1510.49	391.286
	10.644	1.03		7.982	0.901		12.317	1.202			1056.39	678.042		841.183	898.571		507.61	415.464
	10.644	1.03		7.896	0.901		12.274	1.202			1435.05	733.25		1131.18	757.952		706.252	421.25
	10.601	1.03		7.854	0.901		12.274	1.202			914.251	985.708		808.803	1015		706.252	640.357
	10.601	1.03		7.811	0.901		12.231	1.202			914.251	645.417		1497.93	906.714		707.961	870.071
	10.601	1.03		7.768	0.901		12.145	1.202			876.798	582.25		1263.65	638.381		550.219	622.214
	10.601	1.03		7.725	0.901		12.059	1.202			914.251	569.542		1568.46	789.952		922.523	591.179
	10.558	1.03		7.682	0.901		12.059	1.202			1288.82	559.792		1783.01	615.333		922.523	611.607
	10.558	1.03		7.682	0.901		11.93	1.202			814.618	782.75		964.559	670.476		1036.48	584.607
	10.515	1.03		7.596	0.858		11.845	1.202			1174.84	461.708		1321.83	602.55		599.42	729.857
	10.515	0.987		7.553	0.858		11.716	1.159			1142.48	739.217		1241.45	560.45		625.799	427.852
	10.515	0.987		7.424	0.858		11.673	1.159			1142.48	519.739		874.023	774.75		761.154	455.481
	10.515	0.987		7.296	0.858		11.673	1.159			878.551	675.304		1000.97	852		761.154	905.407
	10.472	0.987		7.253	0.858		11.587	1.159			1295.94	684.478		987.882	686.95		1113.88	619.296
	10.3	0.987		7.253	0.858		11.415	1.159			1810.17	568.826		969.189	832.4		694.602	723.296
	10.258	0.987		7.21	0.858		11.373	1.159			1092.76	982.13		853.071	926.9		945.513	590.593
	10.129	0.987		7.21	0.858		11.33	1.159			1386.9	970.217		853.071	700.7		664.894	558.963
	10.086	0.987		7.21	0.858		11.287	1.159			806.915	765.826		853.071	510.2		575.373	770.074
	10.086	0.987		7.167	0.858		11.287	1.159			806.915	642.87		1275	854.85		667.357	418.111
	9.871	0.944		7.081	0.858		10.943	1.159			1734.91	721.864		1038.25	761.55		658.208	361.444
	9.871	0.944		7.038	0.858		10.943	1.116			814.491	761.318		1060.12	985.25		658.208	498.923
	9.871	0.944		6.952	0.858		10.943	1.116			1039.13	356.591		740.753	800.55		658.208	581.846
	9.871	0.944		6.866	0.858		10.9	1.116			1039.13	609.818		1173.3	928.9		551.941	683.308
	9.828	0.944		6.824	0.858		10.9	1.116			1535.98	490.045		1116.52	635.9		551.941	548.423
	9.785	0.944		6.824	0.858		10.772	1.116			733.232	572.955		697.264	670.55		687.143	438.731
	9.785	0.944		6.824	0.858		10.643	1.116			733.232	698.091		1116.52	656.6		688.069	570.692
	9.785	0.944		6.738	0.858		10.643	1.116			733.232	519.955		911.274	571.3		688.069	466.5
	9.743	0.944		6.695	0.858		10.643	1.116			1166.43	652.955		984.878	605.9		688.069	557.731
	9.7	0.944		6.652	0.858		10.643	1.116			1009.87	521.727		1077.11	657.45		688.069	431.115
	9.442	0.901		6.351	0.858		10.6	1.116			557.464	721.762		1060.65	574.75		900.761	441.038
	9.399	0.901		6.266	0.815		10.6	1.073			741.132	780.619		862.884	792.737		902.498	995.08
	9.399	0.901		6.266	0.815		10.6	1.073			749.374	829.619		694.719	665.737		661.081	603.28
	9.356	0.901		6.266	0.815		10.6	1.073			773.353	718.286		988.027	703.526		661.081	523.64
	9.313	0.901		6.223	0.815		10.514	1.073			1291.88	837.619		842.007	932.158		1020.63	600.84
	9.27	0.901		6.223	0.815		10.514	1.073			1539.91	829.857		842.007	586.368		610.029	516.84
	9.227	0.901		6.18	0.815		10.514	1.073			1154.05	599.476		890.264	625.474		610.029	588.12
	9.185	0.901		6.137	0.815		10.471	1.073			1129.52	784.714		600.608	481.211		906.988	570.84
	9.185	0.901		6.094	0.815		10.343	1.073			1255.68	1129.67		748.69	826.684		865.739	680.72
	9.185	0.901		6.051	0.815		10.257	1.073			944.855	687.095		1391.35	847.105		500.485	459
	9.185	0.901		6.051	0.815		10.085	1.073			944.855	655.667		1539.45	612.105		657.136	514.68
	9.056	0.901		6.008	0.815		9.999	1.073			1774.81	711.571		1300.95	639.368		1053.85	472.84
	8.97	0.901		6.008	0.815		9.999	1.03			801.278	638.381		788.436	551.842		605.193	500.208
	8.97	0.901		5.965	0.815		9.999	1.03			801.278	663.476		942.115	635		605.193	209.583
	8.97	0.901		5.879	0.815		9.871	1.03			709.158	544.286		754.095	623.895		892.27	614.708
	8.97	0.901		5.836	0.815		9.742	1.03			709.158	647.19		1563.67	663.579		677.722	580.625
	8.97	0.901		5.751	0.772		9.699	1.03			709.158	631.714		1716.72	438.167		601.527	630
	8.97	0.901		5.751	0.772		9.656	1.03			709.158	569.952		1716.72	790.667		563.204	635.625
	8.97	0.901		5.751	0.772		9.656	1.03			709.158	559.143		1716.72	846.556		563.204	601.833
	8.884	0.901		5.708	0.772		9.656	1.03			907.087	450.381		764.737	768.944		824.84	609.708
	8.884	0.901		5.708	0.772		9.656	1.03			1616.26	506.524		787.286	627.111		563.204	536.125
	8.841	0.901		5.665	0.772		9.656	1.03			1014.18	670.81		799.083	653.5		563.204	508.875
	8.798	0.901		5.665	0.772		9.613	1.03			1504.15	719.095		880.689	835.944		823.688	409.708
	8.712	0.901		5.622	0.772		9.613	1.03			965.291	492.667		795.328	740.556		823.688	458.708
	8.67	0.858		5.536	0.772		9.527	1.03			1534.07	1019		1048.64	742.056		901.829	440.333
	8.627	0.858		5.493	0.772		9.484	1.03			811.667	571.75		998.758	702.889		1026.24	508.208
	8.627	0.858		5.45	0.772		9.441	0.987			1871.7	687.4		879.827	777.833		701.355	730.957
	8.627	0.858		5.407	0.772		9.441	0.987			811.667	911.55		1007.18	983.667		681.909	793.087
	8.584	0.858		5.407	0.772		9.441	0.987			668.54	650.2		797.722	693.444		647.15	718.435
	8.584	0.858		5.364	0.772		9.441	0.987			1412.85	674		920.256	555.222		906.509	713.826
	8.584	0.858		5.322	0.772		9.398	0.987			1412.85	805.55		881.806	575.056		649.027	750.522
	8.412	0.858		5.322	0.772		9.398	0.987			205.893	673.85		881.806	503.389		649.027	672.696
	8.412	0.858		5.322	0.772		9.398	0.987			1109.22	658.9		992.065	854.5		649.027	639.87
	8.412	0.858		5.322	0.73		9.356	0.987			205.893	805.15		992.065	705		833.647	571.957
	8.369	0.858		5.279	0.73		9.356	0.987			778.256	664.75		1487.88	756.706		502.61	510.261
	8.326	0.858		5.279	0.73		9.356	0.987			706.227	684.35		1140.23	788.765		923.165	453.043
	8.283	0.858		5.279	0.73		9.27	0.987			1164.21	804.4		935.911	655.882		925.866	493.478
	8.283	0.858		5.279	0.73		9.227	0.987			1164.21	500.45		935.911	720.118		613.674	419.391
	8.24	0.858		5.236	0.73		9.227	0.987			1358.74	458.5		1313.49	597.118		613.674	562.913
	8.24	0.858		5.236	0.73		9.227	0.944			832.318	606.35		1313.49	716.588		613.674	677.227
	8.24	0.858		5.236	0.73		9.184	0.944			832.318	415.35		1313.49	509.765		948.589	731.136
	8.197	0.815		5.236	0.73		9.184	0.944			827.016	714.579		1133.75	811.353		1320.67	799.636
	8.197	0.815		5.236	0.73		9.098	0.944			827.016	695.947		1313.49	750.941		720.311	870.227
	8.155	0.815		5.193	0.73		9.098	0.944			701.416	968.421		669.388	280.118		602.613	387.909
	8.069	0.815		5.193	0.73		9.098	0.944			565.117	948		1198.68	630.824		720.311	647.318
	8.069	0.815		5.193	0.73		9.098	0.944			565.117	1052.53		779.851	820.294		776.722	394.182
	8.069	0.815		5.15	0.73		9.098	0.944			1654.14	633.579		1527.35	893.235		602.613	500.409
	8.026	0.815		5.15	0.73		9.098	0.944			722.738	998.105		1201.53	737.294		602.613	503.182
	8.026	0.815		5.15	0.73		9.055	0.944			1119.68	703.368		901.517	801.765		535.801	429.591
	7.94	0.815		5.15	0.73		8.969	0.944			1321.73	911.842		928.825	986.529		612.421	426.682
	7.94	0.815		5.064	0.73		8.926	0.901			1321.73	702.579		1304.62	816.412		786.192	712.381
	7.94	0.815		4.935	0.73		8.883	0.901			1321.73	739.368		812.713	553.294		665.193	815.238
	7.854	0.815		4.935	0.73		8.883	0.901			912.306	674.579		812.713	614.294		665.193	674
	7.854	0.815		4.892	0.73		8.883	0.901			912.306	913.789		1364.3	581.235		665.193	539.238
	7.811	0.815		4.892	0.73		8.841	0.901			800.632	857.263		672.974	564.412		629.835	610.571
	7.725	0.815		4.849	0.73		8.669	0.901			947.456	578.684		761.566	590.529		992.069	755.857
	7.725	0.815		4.849	0.73		8.583	0.901			741.544	840.474		1031.54	615.706		857.435	385.476
	7.682	0.815		4.764	0.73		8.583	0.901			1220.3	665.632		1147	348.235		565.635	523.095
	7.64	0.815		4.721	0.73		8.583	0.901			842.472	536.316		1146.98	411.118		857.435	490.714
	7.597	0.815		4.721	0.73		8.54	0.901			826.085	568		926.382	586.588		604.332	767.905
	7.597	0.815		4.678	0.73		8.54	0.901			929.322	631.474		973.339	590.412		604.332	479.143
	7.554	0.815		4.635	0.687		8.497	0.901			957.142	478.368		875.778	704.625		1016.05	432.524
	7.554	0.815		4.635	0.687		8.454	0.901			957.142	704.895		875.778	567.625		787.335	605.333
	7.511	0.815		4.635	0.687		8.454	0.901			1234.81	574.895		729.389	603.25		787.335	771.81
	7.511	0.815		4.549	0.687		8.411	0.901			831.566	784.947		920.358	533.438		538.408	885.238
	7.468	0.815		4.549	0.687		8.411	0.901			799.948	745.947		657.509	841.938		1210.7	497.048
	7.382	0.815		4.463	0.687		8.368	0.901			1146.99	393.421		759.385	862.688		620.779	508.952
	7.339	0.815		4.463	0.687		8.326	0.901			931.801	640.632		744.442	791.938		1008.09	453.381
	7.339	0.815		4.334	0.687		8.283	0.901			824.327	714.684		912.545	568		1041.11	512.333
	7.296	0.773		4.334	0.687		8.283	0.901			1025.01	799.778		1648.89	880.562		1041.11	586.238
	7.296	0.773		4.334	0.687		8.283	0.901			666.194	693.5		912.545	854.438		758.358	362.667
	7.21	0.773		4.292	0.687		8.24	0.901			1371.98	861.056		735.39	988.062		535.594	449.524
	7.167	0.773		4.292	0.687		8.197	0.858			812.192	863.667		1172.64	679.188		815.723	628.2
	7.167	0.773		4.292	0.687		8.154	0.858			812.192	643.889		704.94	711.438		626.011	450.25
	7.167	0.773		4.292	0.687		8.111	0.858			664.766	913.333		1959.21	767.312		913.344	527.7
	7.124	0.773		4.249	0.687		8.068	0.858			1075.12	1013.89		1078.54	700.25		816.761	877.55
	7.124	0.773		4.206	0.687		8.025	0.858			666.494	766.333		1110.73	511.375		871.209	617.8
	7.082	0.773		4.206	0.687		7.939	0.858			1017.45	580.222		1336.33	751.375		560.568	605.2
	7.082	0.773		4.163	0.687		7.939	0.858			1017.45	335.167		1017.83	737.875		804.957	688
	7.039	0.773		4.077	0.687		7.896	0.858			772.659	809.833		670	688.875		506.109	684.6
	7.039	0.773		4.077	0.687		7.811	0.858			772.659	826.778		922.811	934.625		801.258	494.1
	6.996	0.773		4.034	0.687		7.768	0.858			539.135	666.667		1255.79	1265.69		476.144	513.85
	6.953	0.773		4.034	0.687		7.553	0.858			937.543	629.556		942.883	731.938		1411.24	524.05
	6.953	0.773		3.991	0.687		7.553	0.858			937.543	649.167		868.183	512.938		1411.24	460.65
	6.953	0.773		3.905	0.644		7.51	0.815			937.543	529.444		868.846	796.8		595.12	572
	6.867	0.773		3.862	0.644		7.51	0.815			912.656	679.889		1174.21	846.467		629.651	898.895
	6.824	0.773		3.819	0.644		7.51	0.815			918.535	607.944		1358.25	557.667		790.697	756.789
	6.738	0.773		3.777	0.644		7.51	0.815			1279.96	460.444		978.33	667.6		850.806	1144.74
	6.738	0.773		3.777	0.644		7.51	0.815			1076.15	555.778		738.659	629.733		850.806	654.895
	6.738	0.73		3.777	0.644		7.51	0.815			973.204	671.824		1077.59	759		629.651	791.842
	6.695	0.73		3.734	0.644		7.381	0.815			816.122	797.529		801.483	724.6		795.715	750.895
	6.695	0.73		3.691	0.644		7.339	0.815			1131.64	991.824		1656.59	800.8		605.655	506.211
	6.652	0.73		3.691	0.644		7.296	0.815			705.935	913.353		864.802	1063.33		713.653	287.316
	6.652	0.73		3.691	0.644		7.124	0.815			627.51	1099.94		765.267	709.067		624.97	457.316
	6.567	0.73		3.691	0.644		7.081	0.815			826.34	906.059		954.488	767.8		885.467	383.789
	6.567	0.73		3.691	0.644		7.081	0.815			826.34	814.353		881.337	713.533		1399.3	390.263
	6.567	0.73		3.648	0.644		6.824	0.815			1112.79	650.824		1136.08	946.4		775.296	556
	6.524	0.73		3.648	0.644		6.824	0.815			684.184	920.765		1146.39	779.6		598.547	451.947
	6.438	0.73		3.648	0.644		6.781	0.815			1494.31	787.412		1032.82	787.6		739.203	395.263
	6.395	0.73		3.605	0.644		6.738	0.815			1241.14	726.824		1073.71	814.067		761.408	573.263
	6.395	0.73		3.605	0.644		6.652	0.772			740.188	527.588		1069.63	739.267		716.452	1082.61
	6.395	0.73		3.562	0.644		6.652	0.772			927.691	553.353		1111.36	293.667		716.452	661.167
	6.352	0.73		3.562	0.644		6.566	0.772			771.736	697.941		1002.7	672.533		794.268	600.111
	6.352	0.73		3.562	0.644		6.566	0.772			771.736	516.529		1002.7	654.933		794.268	831.5
	6.309	0.73		3.519	0.644		6.523	0.772			938.959	850.529		1037.28	457.667		966.368	684.556
	6.309	0.73		3.519	0.601		6.523	0.772			945.442	242.118		1309.98	753.643		704.276	592.778
	6.309	0.73		3.476	0.601		6.48	0.772			945.442	614.353		659.827	565		645.225	610.167
	6.266	0.73		3.476	0.601		6.437	0.772			969.753	948.882		881.259	697.214		820.633	581.611
	6.223	0.73		3.433	0.601		6.437	0.772			760.379	622		872.188	620.857		821.48	588.889
	6.137	0.73		3.39	0.601		6.309	0.772			751.762	546.471		933.975	805.143		780.449	827.167
	6.052	0.73		3.39	0.601		6.223	0.772			1407.36	944.235		853	560.143		726.524	892.389
	6.009	0.73		3.39	0.601		6.223	0.772			1332	643.765		1111.3	818.214		726.524	567
	6.009	0.73		3.39	0.601		6.18	0.772			901.329	871.118		939.506	650.286		532.75	437.722
	6.009	0.687		3.39	0.601		6.18	0.772			1599.29	713.625		1147.92	803.143		914.882	645.667
	5.966	0.687		3.39	0.601		6.094	0.772			1062.77	721		1099.38	646.643		588.014	613.444
	5.923	0.687		3.347	0.601		6.094	0.772			1003.96	749.688		1118.92	519.786		588.014	479.889
	5.88	0.687		3.347	0.601		6.008	0.772			1121.2	1077.38		1109.23	871		681.743	435.333
	5.88	0.687		3.304	0.601		5.965	0.772			1131.12	693.562		780.831	632.357		772.223	425.833
	5.88	0.687		3.262	0.601		5.922	0.772			722.219	1027.75		1286.41	834.214		568.007	581.389
	5.794	0.687		3.262	0.601		5.922	0.73			879.23	762.188		645.632	819.214		768.225	615.059
	5.794	0.687		3.262	0.601		5.879	0.73			949.83	755.5		718.145	822.5		586.993	579.412
	5.751	0.687		3.262	0.601		5.879	0.73			1428.28	763.812		1286.41	505.214		495.964	392.059
	5.751	0.687		3.262	0.601		5.836	0.73			853.701	405.375		718.145	346.929		848.721	290.412
	5.665	0.687		3.219	0.601		5.836	0.73			1083.68	647.375		827.947	842.714		848.721	688.353
	5.665	0.687		3.219	0.601		5.836	0.73			735.136	800.125		1127.4	1162.57		962.882	617.235
	5.622	0.687		3.219	0.601		5.751	0.73			896.901	656.812		1338.53	803.357		589.157	542.176
	5.622	0.687		3.219	0.601		5.751	0.73			1138.18	690.625		789.64	604.571		502.552	580.412
	5.622	0.687		3.176	0.601		5.751	0.73			1081.1	590.812		646.946	706.286		502.552	583.765
	5.622	0.687		3.176	0.601		5.665	0.73			738.389	608.5		1038.54	813.857		458.955	583.118
	5.622	0.687		3.176	0.601		5.622	0.73			1138.18	564.125		983.77	548.643		914.115	502.235
	5.622	0.687		3.133	0.601		5.622	0.73			1138.18	1010.75		691.397	714.643		816.595	588.706
	5.494	0.687		3.09	0.601		5.579	0.73			1062.31	578.688		573.111	495.857		485.485	403.588
	5.494	0.687		3.09	0.601		5.536	0.73			1043.53	607.75		890.764	497.571		988.535	792.765
	5.494	0.687		3.09	0.601		5.536	0.73			1043.53	664.562		863.208	864.214		1132.62	473.706
	5.451	0.687		3.047	0.601		5.493	0.73			1011.28	698.562		1301.99	1241.86		754.211	437.294
	5.451	0.687		3.047	0.601		5.45	0.73			865.567	666.125		1032.9	684.929		534.307	425.235
	5.451	0.687		3.047	0.601		5.407	0.687			999.339	512.875		783.239	596.714		450.921	758.688
	5.408	0.687		3.004	0.601		5.364	0.687			750.127	605.5		861.186	715.214		679.936	541.688
	5.408	0.687		3.004	0.601		5.364	0.687			750.127	428.875		630.1	736.5		747.304	623.75
	5.408	0.644		2.961	0.558		5.364	0.687			680.794	1173.13		1105.1	685.385		700.736	626.75
	5.408	0.644		2.918	0.558		5.364	0.687			1528.16	484.467		716.294	700.385		700.736	673.938
	5.408	0.644		2.918	0.558		5.364	0.687			657.175	554.4		1068.18	620.538		700.736	547.438
	5.408	0.644		2.918	0.558		5.322	0.687			1528.16	1108.33		919.206	848.692		941.556	635.438
	5.408	0.644		2.918	0.558		5.322	0.687			1528.16	1024.27		804.603	723		950.919	640.938
	5.408	0.644		2.918	0.558		5.322	0.687			750.127	599.2		932.397	786		577.742	668.625
	5.365	0.644		2.875	0.558		5.279	0.687			900.08	556		764.284	582.538		1313.52	408.062
	5.365	0.644		2.875	0.558		5.236	0.687			828.312	759.267		1303.67	647.154		508.697	445.062
	5.322	0.644		2.875	0.558		5.236	0.687			1232.32	1058.8		696.478	686.846		564.836	475.625
	5.322	0.644		2.875	0.558		5.236	0.687			834.081	643.667		1203.05	725.615		541.164	572.688
	5.322	0.644		2.875	0.558		5.193	0.687			701.347	550.533		751.269	758.385		539.223	316.875
	5.279	0.644		2.832	0.558		5.193	0.687			1007.52	840.6		1010.3	577.462		796.744	536.312
	5.236	0.644		2.832	0.558		5.193	0.687			685.139	711.733		949.697	428.846		796.744	526.188
	5.236	0.644		2.832	0.558		5.15	0.687			191.623	772		804.061	689.154		714.317	451.062
	5.236	0.644		2.832	0.558		5.15	0.687			718.123	599.867		1232.58	730.077		593.117	621.562
	5.236	0.644		2.832	0.558		5.15	0.687			703.705	658.133		1249.88	803.231		873.5	492.312
	5.236	0.644		2.832	0.558		5.064	0.687			718.123	432.067		804.061	874.231		704.864	448.875
	5.15	0.644		2.789	0.558		5.021	0.687			1040.62	447.8		1078.89	542.846		486.239	384.375
	5.107	0.644		2.789	0.558		4.978	0.687			783.664	703.533		1078.89	883.769		716.819	507.938
	5.107	0.644		2.789	0.558		4.935	0.687			942.866	516.8		614.631	651.538		547.896	561.375
	5.107	0.644		2.747	0.558		4.935	0.687			942.866	523.267		726.891	724.615		1034.12	452.688
	5.064	0.644		2.747	0.558		4.892	0.644			746.551	496.533		743.156	675		672.263	506.8
	5.064	0.644		2.747	0.558		4.892	0.644			1035.19	453.267		657.516	667.923		803.904	617.867
	5.021	0.644		2.747	0.558		4.849	0.644			1025.49	532.533		657.516	688.846		729.354	1015.33
	5.021	0.601		2.747	0.558		4.849	0.644			761.752	852		657.516	640.077		864.097	469.6
	5.021	0.601		2.704	0.558		4.849	0.644			761.752	541.357		627.746	729.077		644.053	894.467
	5.021	0.601		2.704	0.558		4.849	0.644			873.701	570.214		741.032	540.308		644.053	766.333
	4.979	0.601		2.661	0.558		4.849	0.644			910.233	535.929		1429.52	740.077		601.965	506.133
	4.979	0.601		2.661	0.558		4.807	0.644			802.164	871.857		705.242	607.538		405.652	506.067
	4.936	0.601		2.661	0.558		4.807	0.644			725.548	776.286		805.145	461.692		405.652	764.8
	4.936	0.601		2.661	0.558		4.807	0.644			936.965	776.571		721.306	609.538		405.652	985.467
	4.936	0.601		2.618	0.558		4.807	0.644			887.852	704.143		585.148	505.231		686.598	568.067
	4.936	0.601		2.618	0.558		4.721	0.644			887.852	631.786		1081.95	518.846		730.682	892.333
	4.893	0.601		2.618	0.558		4.678	0.644			1680.25	743.143		833.279	783.462		630.679	693.4
	4.893	0.601		2.618	0.515		4.635	0.644			835.86	747		847.656	617.917		571.278	456.8
	4.85	0.601		2.618	0.515		4.635	0.644			981.558	650.429		847.656	716.25		605.796	765.2
	4.85	0.601		2.575	0.515		4.592	0.644			1530.86	830.571		930.567	463.833		1140.91	531.867
	4.807	0.601		2.532	0.515		4.592	0.644			601.107	959.357		782.542	726		916.028	590
	4.807	0.601		2.532	0.515		4.549	0.644			675.027	865.929		904.186	654.083		608.264	455.267
	4.807	0.601		2.532	0.515		4.549	0.644			661.661	801.571		889.746	675.167		711.425	564.2
	4.807	0.601		2.532	0.515		4.506	0.644			601.107	751.857		782.542	1087.83		1206.43	536
	4.807	0.601		2.532	0.515		4.334	0.644			675.027	922.571		799.068	789.583		650.495	545.6
	4.807	0.601		2.489	0.515		4.334	0.644			601.107	833.857		697.414	557.5		567.465	485.533
	4.764	0.601		2.489	0.515		4.334	0.644			1260.01	447.286		727.172	591		627.673	506.067
	4.764	0.601		2.446	0.515		4.334	0.601			893.396	694.357		874.263	883.167		833.337	424.571
	4.721	0.601		2.446	0.515		4.334	0.601			918.755	593.571		740.088	982.417		616.525	563
	4.721	0.601		2.446	0.515		4.334	0.601			680.245	669.357		1231.61	940.417		1048.49	658.143
	4.721	0.601		2.446	0.515		4.334	0.601			1089.68	571.286		908.263	561.5		1048.49	496.643
	4.721	0.601		2.446	0.515		4.292	0.601			1093.94	750.214		1134.86	761.25		615.16	1001.07
	4.721	0.601		2.36	0.515		4.292	0.601			857.464	472.571		1290.18	459		1136.92	673.357
	4.721	0.601		2.36	0.515		4.292	0.601			1523.27	612.429		854.745	551.083		1764.63	653.786
	4.721	0.601		2.36	0.515		4.249	0.601			909.336	593.071		987.873	903.917		815.424	778.071
	4.721	0.601		2.36	0.515		4.249	0.601			909.336	490.857		1067.14	849.833		661.202	812.429
	4.721	0.601		2.36	0.515		4.206	0.601			750.927	560.071		812.491	823.25		583.398	599.643
	4.721	0.558		2.317	0.515		4.206	0.601			1093.94	761.615		1334.06	574.75		682.408	846.286
	4.635	0.558		2.317	0.515		4.206	0.601			1324.17	991.385		673.963	815.583		622.316	521.5
	4.635	0.558		2.275	0.515		4.12	0.601			925.028	582.231		583.717	879.583		868.927	449
	4.592	0.558		2.275	0.515		4.12	0.601			1621.55	448.154		860.264	1152.67		868.927	464.286
	4.592	0.558		2.275	0.515		4.034	0.601			862.981	726		1298.62	846.417		584.181	477.571
	4.549	0.558		2.275	0.515		4.034	0.601			809.594	569.462		1146.68	949.417		776.479	863
	4.549	0.558		2.232	0.515		4.034	0.601			809.594	913.923		751.038	828		896.138	527.071
	4.549	0.558		2.232	0.515		4.034	0.601			859.934	673.769		735.077	788.917		699.181	465.714
	4.549	0.558		2.189	0.515		3.948	0.601			942.462	918.462		960.549	770.083		535.272	400.714
	4.549	0.558		2.189	0.472		3.948	0.601			942.462	509.308		1009.92	572		535.272	526.143
	4.549	0.558		2.189	0.472		3.905	0.558			859.934	414.077		816.216	680.182		538.231	743.385
	4.464	0.558		2.189	0.472		3.819	0.558			688.788	714.846		854.961	776.364		823.056	726.692
	4.464	0.558		2.146	0.472		3.819	0.558			1454.02	765		763.1	456.182		578.517	632.769
	4.464	0.558		2.146	0.472		3.777	0.558			695.587	773.462		775.22	1681.91		537.966	868.769
	4.464	0.558		2.103	0.472		3.734	0.558			995.231	788.231		839.143	681.727		799.989	651.462
	4.421	0.558		2.103	0.472		3.734	0.558			478.835	369.462		719.939	1135.73		1129.1	508.923
	4.421	0.558		2.103	0.472		3.734	0.558			700.388	693.538		806.184	673.182		1129.1	615.462
	4.378	0.558		2.103	0.472		3.691	0.558			619.343	750.308		719.939	767.727		465.605	725.692
	4.335	0.558		2.103	0.472		3.691	0.558			1237.84	498.308		1359.8	682.091		579.593	620.615
	4.335	0.558		2.103	0.472		3.648	0.558			791.554	594.231		839.143	869.636		976.694	775.231
	4.335	0.558		2.06	0.472		3.648	0.558			798.96	604.308		929.875	755.455		976.694	642.923
	4.335	0.558		2.06	0.472		3.648	0.558			708.812	510.154		838.667	1010.82		510.494	488.538
	4.335	0.558		2.017	0.472		3.648	0.558			708.812	514.923		1415.17	1683.55		881.647	453.077
	4.292	0.558		2.017	0.472		3.605	0.558			1267.76	622.308		817.83	820.273		703.417	815
	4.249	0.558		1.974	0.472		3.605	0.558			1441.42	887.923		1174.5	715		712.226	533.231
	4.249	0.558		1.974	0.472		3.562	0.558			1624.32	469.923		814.304	815.545		838.301	447.154
	4.249	0.558		1.974	0.472		3.562	0.558			1012.5	810.385		1126.91	562.091		838.301	482
	4.249	0.558		1.931	0.472		3.562	0.558			1171.38	435.846		792.267	869.455		612.253	549.769
	4.249	0.558		1.931	0.472		3.476	0.558			535.414	463.154		1153.93	903.909		644.012	521.231
	4.249	0.515		1.888	0.472		3.476	0.558			1012.5	598.583		897.273	703.273		644.012	403.538
	4.249	0.515		1.888	0.472		3.433	0.558			1012.5	954.417		1369.2	676.636		639.575	542.615
	4.163	0.515		1.888	0.472		3.39	0.558			1338.08	882.333		960.386	1068.55		608.266	395
	4.163	0.515		1.888	0.472		3.39	0.558			966.66	770.583		737.795	451.909		654	401
	4.163	0.515		1.888	0.472		3.39	0.558			1127.32	1043.92		715.545	862.818		453.367	524.385
	4.12	0.515		1.888	0.472		3.347	0.558			914.604	908.917		874	508.636		1399.08	365
	4.12	0.515		1.888	0.472		3.347	0.558			664.99	1114.75		1048.34	745.455		644.5	475.538
	4.077	0.515		1.845	0.472		3.347	0.558			1129.34	702		724.767	843.727		733.846	513.231
	4.034	0.515		1.845	0.472		3.347	0.558			1221.23	764.333		795.581	830.273		1039.77	497.769
	4.034	0.515		1.802	0.472		3.304	0.558			1221.23	1179.67		866.119	594.273		792.558	406.615
	3.991	0.515		1.802	0.472		3.304	0.558			1054.14	641		954.357	651.909		792.558	468.231
	3.991	0.515		1.802	0.472		3.262	0.558			1436.66	908		1051.9	714.818		746.132	394.538
	3.949	0.515		1.76	0.472		3.262	0.558			661.326	656.833		1025.78	852.636		718.829	384.923
	3.949	0.515		1.76	0.472		3.262	0.558			661.326	763.667		1006.32	739.455		419.197	389.077
	3.949	0.515		1.717	0.472		3.219	0.558			871.022	781.667		903.075	845.273		657.653	431.462
	3.906	0.515		1.717	0.472		3.176	0.558			1024.14	614.167		720.95	559.364		326.405	429.308
	3.906	0.515		1.717	0.472		3.176	0.558			722	804		1234.62	535.727		746.365	576.231
	3.863	0.515		1.674	0.429		3.176	0.558			861.578	810		1034.8	667.7		566.919	600.231
	3.863	0.515		1.674	0.429		3.176	0.515			861.578	644.667		727.872	699.3		613.703	597.917
	3.82	0.515		1.674	0.429		3.176	0.515			937.551	704.333		1110.54	1040.2		326.405	982.083
	3.82	0.515		1.631	0.429		3.133	0.515			768.348	761.5		836.579	601.1		692.699	670.333
	3.82	0.515		1.588	0.429		3.09	0.515			1120.75	731.917		633.432	412.3		546.264	493.167
	3.82	0.515		1.588	0.429		3.09	0.515			1120.75	539.833		639.973	626.3		596.097	280.75
	3.82	0.515		1.588	0.429		3.09	0.515			868.719	874.167		914.838	534.9		579.444	733.75
	3.82	0.515		1.545	0.429		3.004	0.515			737.809	884.75		1036.33	456		793.843	599.75
	3.82	0.515		1.545	0.429		3.004	0.515			945.258	726.333		994.889	907.7		954.571	779.083
	3.82	0.515		1.545	0.429		3.004	0.515			768.348	759		898	495.6		724.171	692.583
	3.82	0.515		1.545	0.429		2.961	0.515			868.719	565		885.528	693.1		724.232	618.333
	3.777	0.515		1.545	0.429		2.918	0.515			1221.52	605.417		802.556	777.6		626.838	336.333
	3.734	0.515		1.545	0.429		2.918	0.515			1061.6	750.417		1002.97	505.1		570.544	651.083
	3.734	0.515		1.502	0.429		2.875	0.515			814.264	607.583		796.314	692.2		495.91	579.417
	3.734	0.515		1.502	0.429		2.875	0.515			619.977	480.25		833.971	741.5		742.433	774.667
	3.734	0.515		1.502	0.429		2.875	0.515			685.31	448.25		923.257	847.8		501.328	365.833
	3.734	0.515		1.502	0.429		2.832	0.515			788.598	476.5		610.2	859.8		645.136	711.667
	3.734	0.515		1.459	0.429		2.832	0.515			841.862	514.667		1149.29	959.2		660.864	673.5
	3.734	0.515		1.459	0.429		2.832	0.515			835.908	698.417		852.765	870		667.788	586.5
	3.734	0.515		1.459	0.429		2.832	0.515			788.598	484.583		957.412	718.2		503.424	583.667
	3.734	0.472		1.459	0.429		2.832	0.515			788.598	703.818		751.853	634.1		993.773	617.25
	3.691	0.472		1.416	0.429		2.789	0.515			1656.38	889.545		762.727	965.9		721.292	785.167
	3.691	0.472		1.416	0.429		2.747	0.515			845.337	649.364		1243.88	806.9		585.219	382
	3.691	0.472		1.416	0.429		2.747	0.515			1055.36	631.091		1224.58	756.3		680.578	399
	3.691	0.472		1.416	0.429		2.747	0.515			629.535	859.455		910.515	614.1		820.219	525.25
	3.648	0.472		1.416	0.429		2.747	0.515			823.906	1104.73		719.909	762.8		731.734	634.917
	3.648	0.472		1.373	0.429		2.747	0.515			802	690		1200.12	556.8		851.859	500.333
	3.648	0.472		1.373	0.429		2.747	0.515			802	628.364		1164.47	615.4		587.078	618.75
	3.605	0.472		1.373	0.429		2.747	0.515			1024.13	668.182		622.625	644.4		395.688	541.25
	3.605	0.472		1.373	0.429		2.747	0.515			571.583	587.727		1001.47	534.9		731.734	570.083
	3.605	0.472		1.33	0.429		2.747	0.515			881.226	861.455		611.161	626.1		731.734	665.917
	3.519	0.472		1.33	0.429		2.704	0.515			544.378	620.636		1030.64	604.2		889.556	574.917
	3.519	0.472		1.33	0.429		2.661	0.515			922.451	533.091		968.387	728.9		305.145	529.833
	3.519	0.472		1.33	0.429		2.618	0.515			726.207	777.273		1028.45	542.7		582.311	427.917
	3.519	0.472		1.33	0.429		2.618	0.515			1373.61	524.273		1148.68	617.4		864.639	569
	3.476	0.472		1.33	0.429		2.618	0.515			627.284	666.091		1113.26	566.3		864.639	518.25
	3.476	0.472		1.33	0.386		2.618	0.515			829.963	528.182		737.097	770.778		667.066	493.25
	3.476	0.472		1.33	0.386		2.618	0.515			1328.91	818.727		791.387	558.444		686.869	469.417
	3.476	0.472		1.33	0.386		2.618	0.515			582.42	594.273		874.29	698.778		686.869	457.167
	3.476	0.472		1.287	0.386		2.618	0.515			981.58	609.818		981.367	722.111		448.23	371.333
	3.476	0.472		1.287	0.386		2.575	0.515			844.481	467.909		806.1	568.778		764.3	462
	3.433	0.472		1.287	0.386		2.575	0.515			754.987	745.455		983.8	520.889		737.483	633.083
	3.433	0.472		1.245	0.386		2.532	0.515			676.125	451.364		670	701.111		680.881	403.5
	3.391	0.472		1.245	0.386		2.532	0.515			1129.4	726.727		1421.38	912		680.881	426.833
	3.348	0.472		1.245	0.386		2.532	0.515			1071.04	556.636		822.724	707.889		734.458	1028
	3.348	0.472		1.245	0.386		2.532	0.515			734.526	568.727		997.931	785.111		565.169	512.5
	3.305	0.472		1.202	0.386		2.489	0.515			820.455	392.818		942.5	697		721.793	437.667
	3.305	0.472		1.202	0.386		2.489	0.515			820.455	540		871.107	581.444		694.31	600.5
	3.305	0.472		1.202	0.386		2.489	0.515			1191.44	630.545		788.214	468.111		694.31	527.75
	3.305	0.429		1.202	0.386		2.489	0.472			1191.44	608.9		963.214	689.889		694.31	652
	3.305	0.429		1.202	0.386		2.489	0.472			1191.44	786.2		907.429	736.222		646.31	688.545
	3.262	0.429		1.202	0.386		2.489	0.472			925.316	813.3		1104.93	917.444		641.362	475.909
	3.219	0.429		1.159	0.386		2.446	0.472			698.053	643.7		645.889	761.444		910.193	702.636
	3.219	0.429		1.159	0.386		2.446	0.472			807.213	664.6		852.037	739.778		1002.23	909.909
	3.219	0.429		1.159	0.386		2.446	0.472			1828.93	645.1		793.889	749.556		1081.67	691
	3.176	0.429		1.159	0.386		2.403	0.472			780.689	637.9		793.889	624		568.411	537.545
	3.176	0.429		1.116	0.386		2.403	0.472			981.946	624.5		428.769	781.667		664.518	684.091
	3.176	0.429		1.116	0.386		2.403	0.472			1226.74	656.8		964	603.111		866.518	681.909
	3.133	0.429		1.116	0.386		2.36	0.472			989.493	620.6		825.923	749.222		639.055	909.182
	3.133	0.429		1.116	0.386		2.36	0.472			1228.1	832.6		793.423	895		1301.96	349.182
	3.133	0.429		1.073	0.386		2.36	0.472			990.466	881.1		810.24	579.556		554.6	542.273
	3.133	0.429		1.073	0.386		2.36	0.472			976.315	669.6		810.24	1060.33		693.345	657.455
	3.09	0.429		1.073	0.386		2.36	0.472			1626.57	420.6		692.28	747.667		693.345	615.909
	3.047	0.429		1.073	0.386		2.36	0.472			1286.91	701.4		1168.36	855.333		693.345	589.364
	3.047	0.429		1.03	0.386		2.317	0.472			830.366	707.4		697.417	755.333		637.463	510.909
	3.047	0.429		1.03	0.386		2.317	0.472			1043.7	460.9		796.875	1064.67		666.185	689.818
	3.004	0.429		0.987	0.386		2.317	0.472			966.314	457.8		766.348	754.111		637.463	731.182
	3.004	0.429		0.987	0.386		2.275	0.472			772.9	340.5		693.783	543.889		570.245	512.545
	3.004	0.429		0.987	0.386		2.275	0.472			1053.47	425.7		856.739	761.333		1019.53	387.364
	3.004	0.429		0.987	0.386		2.275	0.472			808.471	675.9		695.348	779		865.453	623.091
	2.961	0.429		0.944	0.386		2.232	0.472			691.029	474.3		591.773	637.556		558.308	534.364
	2.961	0.429		0.944	0.386		2.232	0.472			857.058	499.1		923.182	697.667		568.731	608.545
	2.961	0.429		0.901	0.386		2.189	0.472			521.696	502.1		877	490		1001.25	617.909
	2.918	0.386		0.901	0.386		2.146	0.472			1053.84	612.333		624.238	636		580.6	348.818
	2.918	0.386		0.901	0.386		2.146	0.472			495.779	743		686.714	592.333		627.8	320.545
	2.918	0.386		0.901	0.386		2.146	0.472			659.721	723.333		1169.1	582.111		782.86	453.818
	2.918	0.386		0.901	0.386		2.146	0.472			1112.75	608.889		692.667	857.222		620.12	537.273
	2.876	0.386		0.901	0.386		2.146	0.472			634.642	720.778		601.952	750.111		782.86	390.455
	2.876	0.386		0.901	0.343		2.103	0.472			908.299	727.778		761.952	688.875		974.653	400.455
	2.876	0.386		0.901	0.343		2.103	0.472			1143.9	822		745.952	568.5		876.551	462.909
	2.876	0.386		0.901	0.343		2.103	0.472			884.597	946.444		1086.48	719		397.51	613.818
	2.876	0.386		0.858	0.343		2.06	0.472			1091.25	598.778		1070.4	565.625		736.812	486.727
	2.876	0.386		0.858	0.343		2.06	0.472			1408.4	601.333		860.8	608.25		829.271	380.909
	2.876	0.386		0.858	0.343		2.06	0.472			1036.34	509.778		812.6	691.25		760.542	452.455
	2.833	0.386		0.858	0.343		2.06	0.472			730.636	577.556		739.65	796.125		736.812	436.545
	2.833	0.386		0.858	0.343		1.974	0.429			858.424	577.111		1005.5	752.125		415.435	658.1
	2.833	0.386		0.815	0.343		1.974	0.429			1039.32	915.444		525	797.75		415.435	610.9
	2.79	0.386		0.815	0.343		1.931	0.429			853.785	831.111		583.632	661.25		585.289	742.4
	2.79	0.386		0.815	0.343		1.931	0.429			752.769	585.778		824	374.375		585.289	291.5
	2.79	0.386		0.815	0.343		1.931	0.429			818.108	605.333		1126.58	444.5		603.689	606.4
	2.79	0.386		0.815	0.343		1.888	0.429			737.154	714.556		1126.58	963.125		711.795	428.2
	2.747	0.386		0.815	0.343		1.888	0.429			887.391	650.778		832.737	349.875		640.182	828.2
	2.747	0.386		0.815	0.343		1.888	0.429			887.391	570.444		865.368	896.625		438.705	557.2
	2.704	0.386		0.772	0.343		1.845	0.429			828.762	679.556		692.5	991.75		625.186	737.9
	2.704	0.386		0.772	0.343		1.802	0.429			563.889	550.111		992.333	881.625		807.667	742
	2.704	0.386		0.772	0.343		1.802	0.429			696.111	651.111		1118.89	711.375		907.738	563.2
	2.704	0.386		0.772	0.343		1.76	0.429			572.159	519.556		822.667	837.25		774.927	697.7
	2.661	0.386		0.772	0.343		1.76	0.429			733.339	432.778		1310.61	975.75		477.78	860.9
	2.661	0.386		0.772	0.343		1.76	0.429			817.484	556.667		791.333	793.125		673	767.7
	2.661	0.386		0.772	0.343		1.76	0.429			1232.11	530.333		791.333	792.25		593.366	627.9
	2.618	0.386		0.73	0.343		1.631	0.429			888.475	458.333		348.235	626.75		555.263	618.4
	2.618	0.386		0.73	0.343		1.631	0.429			1015.21	559.556		747	704.875		801.368	670.7
	2.618	0.386		0.73	0.343		1.588	0.429			590.492	747.778		589.235	943.375		662.595	546
	2.618	0.386		0.73	0.343		1.588	0.429			1097.66	496.111		819.706	900.625		787.73	634.7
	2.618	0.386		0.687	0.343		1.545	0.429			1159.75	484.444		820.5	559.5		513.722	667.6
	2.575	0.386		0.687	0.343		1.545	0.429			820.533	508		482.062	786.75		713.861	756.6
	2.575	0.386		0.687	0.343		1.545	0.429			1155.5	567.778		1155.38	913.875		747.306	500.2
	2.575	0.386		0.687	0.343		1.545	0.429			935	554.111		878.125	719.625		387.444	440.8
	2.575	0.386		0.644	0.343		1.502	0.429			759.483	354.667		622.4	660.125		639.2	532.6
	2.532	0.386		0.644	0.343		1.502	0.429			814.356	509.889		766.267	571.5		531.914	709.7
	2.489	0.386		0.644	0.343		1.459	0.429			1010.62	515.556		729.8	593.5		469.853	445
	2.489	0.343		0.644	0.343		1.459	0.429			1722.1	623.375		605.4	918.375		536.5	471.6
	2.489	0.343		0.558	0.343		1.416	0.429			855.121	567.375		1058.92	506.375		503.333	414.6
	2.403	0.343		0.558	0.343		1.416	0.429			1044.18	532.5		614.462	514.25		863.061	492.3
	2.403	0.343		0.558	0.343		1.416	0.429			690.429	1009.75		677.846	567.875		515.545	530.5
	2.403	0.343		0.558	0.343		1.416	0.429			721.804	614.375		677.846	843.875		919.455	565.2
	2.361	0.343		0.558	0.343		1.416	0.429			669.564	823.375		1011.31	621.625		597	313.1
	2.361	0.343		0.558	0.343		1.416	0.429			669.564	874.5		869.846	390.5		672.97	532.9
	2.361	0.343		0.558	0.343		1.416	0.429			727.873	658.625		765.385	823.25		470.152	523.4
	2.361	0.343		0.558	0.343		1.373	0.429			867.6	792.75		743.846	555.25		891.312	453.9
	2.361	0.343		0.515	0.343		1.373	0.429			707.964	784.5		634	644.5		737.25	422.4
	2.361	0.343		0.515	0.343		1.373	0.429			1150.33	856.625		905.083	661.75		734.031	441.2
	2.361	0.343		0.515	0.343		1.373	0.429			707.964	693		908.083	814.875		891.312	528.5
	2.361	0.343		0.472	0.343		1.33	0.386			723.818	760.125		749	776		754.613	712.444
	2.318	0.343		0.472	0.343		1.287	0.386			892.296	796.375		772.909	656.375		692.767	611.444
	2.318	0.343		0.472	0.343		1.287	0.386			664.593	611.375		924.364	609		773.2	798.778
	2.318	0.343		0.429	0.343		1.287	0.386			892.296	640.75		636.3	706.75		538.1	926.222
	2.318	0.343		0.429	0.3		1.287	0.386			794.148	676.25		888.1	806.143		840.233	790.889
	2.275	0.343		0.386	0.3		1.287	0.386			967.264	717.125		631.222	584.714		840.233	423
	2.275	0.343		0.386	0.3		1.202	0.386			742.774	786.875		638	912.571		562.143	747.667
	2.275	0.343		0.343	0.3		1.202	0.386			831.83	1053.25		608.625	771.143		421.25	720.444
	2.232	0.343		0.343	0.3		1.202	0.386			516.115	647.25		759.5	613.571		429.786	814.222
	2.232	0.343		0.343	0.3		1.202	0.386			1070.27	907.875		478.625	577		429.786	451.667
	2.232	0.343		0.343	0.3		1.159	0.386			516.115	581		514.5	650.429		448.667	649.778
	2.232	0.343		0.343	0.3		1.159	0.386			841.327	788.625		832.875	646		492.037	520.333
	2.232	0.343		0.3	0.3		1.159	0.386			765.462	759.875		891.143	760		492.037	653.889
	2.189	0.343		0.3	0.3		1.159	0.386			488.471	890.25		705.286	720.571		427.852	677.556
	2.189	0.343		0.3	0.3		1.159	0.386			890.608	796.625		962.429	657		764	594.111
	2.189	0.343		0.257	0.3		1.159	0.386			791.314	590.25		613	497.857		644.667	990.667
	2.146	0.343		0.257	0.3		1.159	0.386			1076.28	534		666.333	459.429		427.852	542
	2.146	0.343		0.257	0.3		1.116	0.386			716.02	841.75		620.167	405.143		626.423	584.556
	2.146	0.343		0.215	0.3		1.116	0.386			1177.6	808.75		754.6	774.286		630.615	740.111
	2.146	0.343		0.215	0.3		1.116	0.386			918.8	521.375		520.8	603.714		592.654	685.889
	2.103	0.343		0.172	0.3		1.116	0.386			710.184	906.375		525.5	520.714		605.923	612.222
	2.103	0.343		0.172	0.3		1.116	0.386			636.184	475.875		624.5	667.714		592.654	846.444
	2.103	0.343		0.172	0.3		1.073	0.386			963.388	517.875		329.75	897.429		456.52	833.444
	2.103	0.343		0.172	0.3		1.073	0.386			658.755	578.125		698.75	608.286		544.36	406.444
	2.06	0.343		0.172	0.3		1.03	0.386			707.958	570.5		952	583.143		209.583	532.889
	2.06	0.343		0.172	0.3		1.03	0.386			846.354	426.875		653.25	650		733.833	584.333
	2.017	0.343		0.129	0.3		1.03	0.386			511.915	614.875		675.667	608.429		816.208	544
	2.017	0.343		0.129	0.3		1.03	0.386			884.851	513.5		582.333	824.571		478.333	671.333
	2.017	0.343		0.129	0.3		0.987	0.386			699.617	523.625		765	882.286		611.304	551.778
	2.017	0.343		0.129	0.3		0.944	0.386			812.723	680.25		566.667	652.286		620.773	674.333
	2.017	0.343		0.129	0.3		0.944	0.386			632.766	526.25		638.333	523		590.818	505.444
	2.017	0.343		0.129	0.3		0.901	0.386			511.915	830.375		627.333	497.143		488.19	356.556
	1.974	0.343		0.129	0.3		0.901	0.386			1014.28	401.25		606	767.286		463.143	299.333
	1.974	0.343		0.129	0.3		0.901	0.386			1109.74	342.375		444	470.286		557.143	506
	1.974	0.343		0.129	0.3		0.901	0.386			715.543	497		597.333	915.429		797.619	538
	1.974	0.343			0.3		0.901	0.386			740.435	414.875			805.857		432.619	629.889
	1.974	0.343			0.3		0.901	0.386			836.63	560.25			770.714		827.762	284.444
	1.931	0.343			0.3		0.901	0.386			1093.69	730.875			601		515.524	505.222
	1.931	0.3			0.3		0.901	0.386			507.711	624.571			617.286		476.476	467.889
	1.931	0.3			0.3		0.858	0.386			727.2	857.286			1133.57		537.25	351.667
	1.931	0.3			0.3		0.858	0.386			691.067	432.714			702.857		527.2	456.111
	1.888	0.3			0.3		0.815	0.386			719.295	644.286			705.143		631.263	484.556
	1.888	0.3			0.3		0.815	0.386			508.659	784.286			506.714		430	393.778
	1.845	0.3			0.3		0.815	0.386			1073.77	630.429			476.429		787.421	424.889
	1.845	0.3			0.3		0.772	0.386			850.465	546.429			654.714		769.333	559.111
	1.803	0.3			0.3		0.772	0.386			725.381	718.571			807.429		529.944	465.889
	1.803	0.3			0.3		0.772	0.386			1047.31	595.143			627.143		769.389	471.889
	1.803	0.3			0.3		0.73	0.343			955.452	1006.57			695		443.471	418.25
	1.803	0.3			0.3		0.73	0.343			655.69	837.429			597.286		629.059	676.625
	1.803	0.3			0.3		0.73	0.343			730.881	422.143			626.286		712.412	510.875
	1.803	0.3			0.3		0.73	0.343			639.738	872			791.571		752.353	545.875
	1.803	0.3			0.3		0.73	0.343			925.929	642.286			664.143		712.412	611.625
	1.803	0.3			0.3		0.687	0.343			811.452	684.571			478.571		521.438	619.5
	1.76	0.3			0.3		0.687	0.343			844.463	841.286			592.143		493.5	594
	1.717	0.3			0.3		0.687	0.343			997.525	729			648.857		560.438	767.625
	1.717	0.3			0.3		0.687	0.343			1144.85	666.286			522		571.688	176.875
	1.717	0.3			0.3		0.687	0.343			815.4	636.286			514.857		717.75	677
	1.717	0.3			0.3		0.687	0.343			845.8	561.857			572.857		572.688	395.125
	1.717	0.3			0.3		0.687	0.343			750.925	707.429			749.714		491.75	566.75
	1.717	0.3			0.3		0.644	0.343			750.925	622.143			839.429		896	725.5
	1.717	0.3			0.3		0.644	0.343			846.375	642.571			642.429		381.867	538
	1.717	0.3			0.3		0.644	0.343			995.65	651.714			1139.57		496.533	299.125
	1.717	0.3			0.257		0.644	0.343			750.925	566.429			753.167		533.067	661.625
	1.674	0.3			0.257		0.644	0.343			1103.28	729.143			748.5		442.8	591.125
	1.674	0.3			0.257		0.644	0.343			744.846	601.286			804.167		513.2	814.375
	1.631	0.3			0.257		0.644	0.343			1039.45	608.857			810		714.933	591
	1.631	0.3			0.257		0.644	0.343			759.211	603.286			767.667		741.533	881.125
	1.631	0.3			0.257		0.644	0.343			821.605	598.143			733.5		714.933	666.5
	1.631	0.3			0.257		0.601	0.343			913.026	552.571			684.167		498.214	232.5
	1.588	0.3			0.257		0.601	0.343			951.892	819.714			670.833		434.429	473.25
	1.588	0.3			0.257		0.601	0.343			977.297	659.143			702		677.857	596.375
	1.588	0.3			0.257		0.601	0.343			869.649	439.143			637.167		470.143	549.5
	1.545	0.3			0.257		0.601	0.343			562.972	443.714			567.5		596.571	715.125
	1.545	0.3			0.257		0.601	0.343			1030.36	394.714			658.833		914.286	584.875
	1.545	0.3			0.257		0.601	0.343			689.056	533.714			1032.67		634.5	381.375
	1.545	0.3			0.257		0.558	0.343			903.5	710.143			689.5		424.769	480.375
	1.545	0.3			0.257		0.558	0.343			1047.78	629.286			629.5		387.923	392.125
	1.545	0.3			0.257		0.558	0.343			824.639	458.429			482.167		423.154	481.375
	1.545	0.3			0.257		0.558	0.343			839.083	563.429			703.5		626.154	500
	1.545	0.3			0.257		0.558	0.343			850.972	753.571			528.667		423.154	428.125
	1.545	0.3			0.257		0.515	0.343			730.444	698.143			550		564.667	507.625
	1.545	0.3			0.257		0.515	0.343			1018.39	602.286			903.667		711.25	608
	1.545	0.3			0.257		0.515	0.343			689.056	962.714			612.333		382	595
	1.502	0.3			0.257		0.515	0.343			889.886	472.571			767.333		679	357.375
	1.502	0.3			0.257		0.515	0.343			655.771	548.714			666.667		659.5	442.625
	1.459	0.3			0.257		0.515	0.343			608.029	513.143			948.167		683.417	525.375
	1.459	0.3			0.257		0.515	0.343			1137.38	436			542.333		632	516.5
	1.459	0.3			0.257		0.472	0.343			944.824	619.571			567.667		868.182	332.375
	1.459	0.258			0.257		0.472	0.343			865.941	717.5			690.333		421.182	444.375
	1.459	0.258			0.257		0.472	0.343			976.088	619			896.5		545.545	486.25
	1.459	0.258			0.257		0.472	0.343			734.412	875.5			668.5		486.091	389
	1.459	0.258			0.257		0.472	0.343			1126.15	743.333			775.333		572.364	451.625
	1.459	0.258			0.257		0.429	0.343			550.5	782			393.167		446.3	602.875
	1.416	0.258			0.257		0.429	0.343			275.545	591.167			373.5		490.3	443.375
	1.416	0.258			0.257		0.386	0.343			920.333	591.833			577		437.556	509.5
	1.373	0.258			0.257		0.386	0.3			804.188	538.167			808.5		669.111	579.143
	1.373	0.258			0.257		0.386	0.3			512.906	752.333			1190.17		667.333	516.429
	1.373	0.258			0.257		0.343	0.3			884.969	830			443.667		232.5	663.571
	1.373	0.258			0.257		0.343	0.3			681.375	511.333			557.667		623.875	346.857
	1.373	0.258			0.257		0.343	0.3			661.656	647			513.167		559	753.286
	1.373	0.258			0.257		0.343	0.3			721.625	497.833			776.333		559	652
	1.33	0.258			0.257		0.343	0.3			505.032	668.833			743.167		357.125	378.429
	1.33	0.258			0.257		0.3	0.3			584.258	787.5			679.5		548.857	454.429
	1.33	0.258			0.257		0.3	0.3			921.032	571.333			805.167		808.714	977.286
	1.33	0.258			0.257		0.3	0.3			423.258	629.5			481.333		341.143	708
	1.33	0.258			0.257		0.3	0.3			687.419	467.333			699.333		459.286	750
	1.33	0.258			0.257		0.3	0.3			849.226	504.5			425.667		606.286	586
	1.33	0.258			0.257		0.3	0.3			1098.23	517.667			642.5		585.714	469.714
	1.33	0.258			0.257		0.3	0.3			584.258	773.333			606.167		529.429	456.286
	1.33	0.258			0.257		0.257	0.3			783.484	494			780.5		450	535.429
	1.288	0.258			0.257		0.257	0.3			857.733	730.667			410.333		444.667	691.286
	1.288	0.258			0.257		0.257	0.3			882.533	713.333			774.833		323.833	287.714
	1.245	0.258			0.257		0.257	0.3			887.621	601.667			598.667		640.333	569.286
	1.245	0.258			0.257		0.257	0.3			632.448	537.333			631.5		926.5	557.143
	1.245	0.258			0.257		0.257	0.3			777.241	758.667			707		462.833	530.143
	1.245	0.258			0.257		0.257	0.3			798.448	401.5			725.833		539.667	813.571
	1.202	0.258			0.257		0.257	0.3			689.821	540.667			600.167		714.167	412.429
	1.202	0.258			0.257		0.257	0.3			783.393	729.833			723.167		576.333	644.714
	1.202	0.258			0.257		0.257	0.3			853.464	550.5			679.5		453.167	339.571
	1.202	0.258			0.257		0.215	0.3			895.821	382.5			614.5		525.4	556
	1.202	0.258			0.257		0.215	0.3			880.571	519.167			616		301.4	477.571
	1.159	0.258			0.257		0.215	0.3			905.481	538.667			588.333		529	438.714
	1.159	0.258			0.257		0.215	0.3			1036.74	434.833			595		450.2	457.429
	1.159	0.258			0.257		0.215	0.3			602.37	587			818		109.2	484
	1.159	0.258			0.257		0.215	0.3			717.741	571.167			459.333		480.4	535.857
	1.159	0.258			0.257		0.215	0.3			543.963	526.667			669		469.8	410.143
	1.116	0.258			0.257		0.215	0.3			471.462	447.833			1150.5		544	369.286
	1.116	0.258			0.257		0.172	0.3			771.962	361.5			546.5		527	678.857
	1.116	0.258			0.257		0.172	0.3			550.346	556.833			684		602	460.857
	1.116	0.258			0.257		0.172	0.3			681.269	722.167			735.5		543.5	303.286
	1.073	0.258			0.257		0.172	0.3			855.16	435			593.667		703.25	594.286
	1.073	0.258			0.257		0.172	0.3			785.08	481.667			639		520.75	428.714
	1.073	0.258			0.257		0.172	0.3			838.08	560.833			748.667		179.25	418.286
	1.073	0.258			0.257		0.172	0.3			1049.96	596.833			641.167		360.5	481.714
	1.03	0.258			0.257		0.172	0.3			806.958	229.333			581.833		441.25	669.286
	1.03	0.258			0.257		0.172	0.3			704.792	553.667			537.333		414.25	359.571
	1.03	0.258			0.257		0.172	0.3			894.5	568.833			645		414.25	377.143
	1.03	0.258			0.257		0.129	0.3			457.833	496.667			662		492.333	515
	0.987	0.258			0.257		0.129	0.3			924.826	478.667			637.333		379.667	421.714
	0.987	0.258			0.257		0.129	0.3			518.217	456.667			500.667		510.667	356
	0.987	0.258			0.257		0.129	0.3			518.217	404.833			357.167		610.667	509.286
	0.987	0.258			0.257		0.129	0.3			788.739	508.667			659.167		621.667	466.857
	0.944	0.258			0.215		0.129	0.3			610.318	545.833			740		392	427.857
	0.944	0.258			0.215			0.257			760.182	518.5			607.4			714.333
	0.901	0.258			0.215			0.257			1181.71	558.333			625.4			707.667
	0.858	0.258			0.215			0.257			906.9	535.333			384.2			707.833
	0.858	0.215			0.215			0.257			702.9	793			675.6			527
	0.815	0.215			0.215			0.257			1185	505			533.6			837.333
	0.815	0.215			0.215			0.257			945.789	533.8			739.6			726.667
	0.815	0.215			0.215			0.257			515.263	849.4			647			648.5
	0.815	0.215			0.215			0.257			964.632	718.4			607.2			531.333
	0.815	0.215			0.215			0.257			507.632	544.4			677.6			602.167
	0.815	0.215			0.215			0.257			507.632	574.4			580.2			572.167
	0.815	0.215			0.215			0.257			776.632	503.4			463.8			548.5
	0.815	0.215			0.215			0.257			815.474	674.8			677.8			940.667
	0.815	0.215			0.215			0.257			1185	734.2			790			646.5
	0.773	0.215			0.215			0.257			824.833	661.4			763.2			723.167
	0.773	0.215			0.215			0.257			809.833	1101.2			869.4			487.5
	0.773	0.215			0.215			0.257			492.778	571.2			760.4			570
	0.773	0.215			0.215			0.257			524.722	924			558			519.167
	0.773	0.215			0.215			0.257			656.056	588.8			548			668.667
	0.773	0.215			0.215			0.257			702.444	588			725.8			770.833
	0.773	0.215			0.215			0.257			641.222	726.2			511.6			315.667
	0.773	0.215			0.215			0.257			736.167	632.6			846			590.5
	0.773	0.215			0.215			0.257			736.167	512.4			756.2			522.667
	0.773	0.215			0.215			0.257			524.722	680			669.4			685.333
	0.773	0.215			0.215			0.257			492.778	826.8			670.4			459.667
	0.773	0.215			0.215			0.257			492.778	962.4			677.8			620.5
	0.73	0.215			0.215			0.257			614.118	561			663.2			648.833
	0.73	0.215			0.215			0.257			242.118	585.6			538.8			421
	0.73	0.215			0.215			0.257			1051.29	687.4			529.4			562.667
	0.73	0.215			0.215			0.257			751.471	593.6			642			610.167
	0.687	0.215			0.215			0.257			824.438	671.2			754.4			529.333
	0.687	0.215			0.215			0.257			769.25	702.2			562.6			450.833
	0.687	0.215			0.215			0.257			838.75	765			412.2			323.833
	0.644	0.215			0.215			0.257			788.8	359			647			446.833
	0.644	0.215			0.215			0.257			874.733	740.8			544.6			473.5
	0.644	0.215			0.215			0.257			1172.93	671.6			444			366.333
	0.601	0.215			0.215			0.257			825.214	801.6			616.8			566.833
	0.601	0.215			0.215			0.257			629.643	700.6			511.4			307.667
	0.601	0.215			0.215			0.257			550.714	614.4			371			410.667
	0.601	0.215			0.215			0.257			791.214	499.2			445.6			290.667
	0.601	0.215			0.215			0.257			734.857	763			776.2			487.667
	0.558	0.215			0.215			0.257			902.538	394			809.2			450.333
	0.558	0.215			0.215			0.257			926.231	663.4			794.6			514.5
	0.558	0.215			0.215			0.257			939.154	623			863.4			497.5
	0.558	0.215			0.215			0.257			660.308	559.2			534.8			437.833
	0.558	0.215			0.215			0.257			939.154	462.2			754			450.5
	0.558	0.215			0.215			0.257			1124.69	545.8			725.4			509.333
	0.515	0.215			0.215			0.257			922.833	437			1116.2			554.5
	0.515	0.215			0.215			0.257			468.083	458.4			316.8			493.5
	0.515	0.215			0.215			0.257			483.167	465.8			650.6			423.833
	0.515	0.215			0.215			0.257			768.583	330.6			645.8			368.667
	0.515	0.215			0.215			0.257			768.583	435.4			612.2			555.833
	0.515	0.215			0.215			0.257			1023.08	397.2			792.2			525.167
	0.472	0.215			0.215			0.257			652	690.6			770.8			496.167
	0.472	0.215			0.215			0.257			603.818	561.6			893.2			479.5
	0.429	0.215			0.215			0.257			634.1	549.2			435.4			437.667
	0.429	0.215			0.215			0.257			1208.3	600.8			636.2			453.167
	0.429	0.215			0.215			0.257			577.7	403			733			463.5
	0.429	0.215			0.215			0.257			512.8	477.2			691.6			542.167
	0.429	0.215			0.215			0.257			837.4	792			558.2			507
	0.429	0.215			0.215			0.257			588.7	702.8			559			433.5
	0.429	0.215			0.215			0.257			780.8	384.6			651.2			467.167
	0.386	0.215			0.215			0.257			760.111	373.2			612.8			498.5
	0.386	0.215			0.215			0.257			757.222	686			458.2			480.5
	0.386	0.215			0.215			0.257			601.778	359.2			324			517.833
	0.386	0.172			0.215			0.257			679.667	373.75			492			333
	0.386	0.172			0.215			0.215			759.778	550.5			469			738.8
	0.386	0.172			0.215			0.215			824.222	619			612.4			240.8
	0.386	0.172			0.215			0.215			591.889	723.75			544.8			337.6
	0.343	0.172			0.215			0.215			640.75	595			568.8			686.6
	0.343	0.172			0.215			0.215			441.875	610.5			585.8			588
	0.343	0.172			0.215			0.215			1080.88	594.75			550			448.6
	0.343	0.172			0.215			0.215			555.125	1151.75			563.6			502.6
	0.343	0.172			0.215			0.215			876.875	640			551			614.2
	0.343	0.172			0.215			0.215			994.125	520.25			550.8			380.2
	0.343	0.172			0.215			0.215			635.625	767.5			582.2			636.4
	0.3	0.172			0.215			0.215			472.429	453			434.6			642.8
	0.3	0.172			0.215			0.215			583.857	843.25			498.6			441.6
	0.3	0.172			0.215			0.215			819.286	773			548.8			836
	0.3	0.172			0.215			0.215			466.429	678.75			713			596.2
	0.3	0.172			0.215			0.215			645.286	590.25			471.2			582.6
	0.258	0.172			0.215			0.215			954.833	670.75			393.4			545
	0.258	0.172			0.215			0.215			1034.33	534.5			500.6			701.4
	0.215	0.172			0.215			0.215			741.2	636			824.2			550.2
	0.215	0.172			0.215			0.215			1024.8	681			497			497.2
	0.215	0.172			0.215			0.215			623.6	687.75			651.2			614.6
	0.172	0.172			0.215			0.215			525.75	658.75			759.6			637.4
	0.172	0.172			0.215			0.215			647.5	547.5			617.4			591.2
	0.172	0.172			0.172			0.215			932	630.5			495.75			779
	0.172	0.172			0.172			0.215			398.25	730.25			635.5			605.6
	0.172	0.172			0.172			0.215			887.25	1040.5			455.5			693.4
	0.172	0.172			0.172			0.215			767	638			607.75			446.6
	0.172	0.172			0.172			0.215			745.25	605.75			502.25			488
	0.172	0.172			0.172			0.215			771.75	745.25			659.25			569.8
	0.172	0.172			0.172			0.215			379.5	563			464.25			455.8
	0.129	0.172			0.172			0.215			585.667	466			515			529
	0.129	0.172			0.172			0.215			688.333	513.25			837.25			601.8
	0.129	0.172			0.172			0.215			753.333	694.25			500.75			601.2
	0.129	0.172			0.172			0.215			312.333	793.75			807			618.6
		0.172			0.172			0.215				740.5			611.25			540.6
		0.172			0.172			0.215				547.25			737.25			708.2
		0.172			0.172			0.215				471.75			579.5			608.2
		0.172			0.172			0.215				667.5			648.5			358
		0.172			0.172			0.215				464.75			883.75			529.4
		0.172			0.172			0.215				578			782.5			655
		0.172			0.172			0.215				815.75			687.5			349.2
		0.172			0.172			0.215				653.5			668.5			387.4
		0.172			0.172			0.215				566			603			338
		0.172			0.172			0.215				753.25			892			459.4
		0.172			0.172			0.215				745.25			481.5			336.2
		0.172			0.172			0.215				369.25			653.25			632.8
		0.172			0.172			0.215				527.5			668.5			345.6
		0.172			0.172			0.215				557.25			689.25			230.8
		0.172			0.172			0.215				844.25			733			605.4
		0.172			0.172			0.215				441.25			258			426.4
		0.172			0.172			0.215				654.75			565.5			442.2
		0.172			0.172			0.215				491			278			426.4
		0.172			0.172			0.215				405			1136.5			378.8
		0.172			0.172			0.215				653.75			624.75			494.8
		0.172			0.172			0.215				428.5			528.25			468.6
		0.172			0.172			0.215				769.75			650			552.4
		0.172			0.172			0.215				622			570.75			565
		0.172			0.172			0.215				554.25			623.25			385.2
		0.172			0.172			0.215				689.25			512.75			362.8
		0.172			0.172			0.215				572.25			626.25			417.8
		0.172			0.172			0.215				467.5			934.25			541.6
		0.172			0.172			0.215				561.75			757.75			373.8
		0.172			0.172			0.215				502			194.75			589.2
		0.172			0.172			0.215				193.25			872			537.8
		0.172			0.172			0.215				628.25			1071.5			522.2
		0.172			0.172			0.215				525.25			518			418.4
		0.172			0.172			0.215				481			505			517.8
		0.172			0.172			0.215				755.5			498.5			406.8
		0.172			0.172			0.215				615.75			692.25			455.6
		0.172			0.172			0.215				515.5			735.5			447.2
		0.172			0.172			0.215				344.5			807.5			409.4
		0.172			0.172			0.215				441.25			570.5			335.6
		0.172			0.172			0.215				729			1079			109.2
		0.172			0.172			0.215				595.5			726			462.8
		0.172			0.172			0.215				576.5			311.25			383.4
		0.172			0.172			0.215				617			583			405
		0.172			0.172			0.215				404			307			536.6
		0.172			0.172			0.215				479.5			519.5			182.4
		0.172			0.172			0.215				693.5			708.75			344.2
		0.172			0.172			0.215				582.75			516			279
		0.172			0.172			0.172				489.75			390.25			1049.5
		0.172			0.172			0.172				534.25			391.75			674.25
		0.172			0.172			0.172				382.5			502			701.25
		0.172			0.172			0.172				568.5			501.75			590
		0.172			0.172			0.172				508.25			552.5			758.5
		0.172			0.172			0.172				260.75			785.5			375.25
		0.129			0.172			0.172				681.333			619			383.75
		0.129			0.172			0.172				546			563.25			837
		0.129			0.172			0.172				734			879.5			757
		0.129			0.172			0.172				794			397.5			571.25
		0.129			0.172			0.172				534.333			437			405.75
		0.129			0.172			0.172				664			468.75			690.5
		0.129			0.172			0.172				557.667			424.5			387.75
		0.129			0.172			0.172				819.333			383.75			472.5
		0.129			0.172			0.172				530			672			571.25
		0.129			0.172			0.172				614.667			538.5			604.5
		0.129			0.172			0.172				894			653.25			542
		0.129			0.172			0.172				635			741.75			685.5
		0.129			0.172			0.172				891.333			585			649.75
		0.129			0.172			0.172				887.667			384.25			658.5
		0.129			0.172			0.172				590			624.5			617.25
		0.129			0.172			0.172				466.333			569.25			608.5
		0.129			0.172			0.172				497.667			552.75			536.75
		0.129			0.172			0.172				593.333			707.75			386.5
		0.129			0.172			0.172				679.667			496.5			479.5
		0.129			0.172			0.172				1019.33			605.75			406.25
		0.129			0.172			0.172				732.667			473.5			861.75
		0.129			0.172			0.172				553			635.75			562.5
		0.129			0.172			0.172				796.333			460.5			318.5
		0.129			0.172			0.172				419.333			496			614
		0.129			0.172			0.172				619.333			464.25			588.25
		0.129			0.172			0.172				664			445.5			788.75
		0.129			0.172			0.172				432.333			504.25			781
		0.129			0.172			0.172				641			548.5			233
		0.129			0.172			0.172				455			664			669
		0.129			0.172			0.172				530.667			496.25			618.5
		0.129			0.172			0.172				710			720.75			425.25
		0.129			0.129			0.172				876.667			357.667			455.25
		0.129			0.129			0.172				657.667			565			517.75
		0.129			0.129			0.172				310.333			671.667			676.25
		0.129			0.129			0.172				564			456.333			651.25
		0.129			0.129			0.172				841			491			626.25
		0.129			0.129			0.172				764.333			492.333			655.5
		0.129			0.129			0.172				618.333			485.333			497
		0.129			0.129			0.172				1026.33			743.333			511.25
		0.129			0.129			0.172				589.667			611.667			431.25
		0.129			0.129			0.172				722.667			442			601
		0.129			0.129			0.172				701.333			663			663
		0.129			0.129			0.172				493.333			654.667			694.75
		0.129			0.129			0.172				614.667			595.667			496
		0.129			0.129			0.172				488			712.667			568.75
		0.129			0.129			0.172				665.333			942			583.75
		0.129			0.129			0.172				613.667			680.667			368.25
		0.129			0.129			0.172				682			513.667			524.5
		0.129			0.129			0.172				569.333			431.667			714
		0.129			0.129			0.172				585.667			478.667			414.25
		0.129			0.129			0.172				586.667			758			335.25
		0.129			0.129			0.172				487.333			850.333			638
		0.129			0.129			0.172				539.333			749			682.25
		0.129			0.129			0.172				265.667			572.667			529.5
		0.129			0.129			0.172				606.667			478			481.5
		0.129			0.129			0.172				440.667			480.333			790.75
		0.129			0.129			0.172				217			623			470.75
		0.129			0.129			0.172				507.667			641			275.25
		0.129			0.129			0.172				508.667			718.667			548.75
		0.129			0.129			0.172				595			572.667			591.5
		0.129			0.129			0.172				501.333			584.667			475.5
		0.129			0.129			0.172				593.333			553.333			556
		0.129			0.129			0.172				417			461.667			580
		0.129			0.129			0.172				441.667			723.667			371
		0.129			0.129			0.172				688.333			717			455.75
		0.129			0.129			0.172				603			682.333			268.5
		0.129			0.129			0.172				641.667			552			540.75
		0.129			0.129			0.172				678			661.333			473
		0.129			0.129			0.172				512			427.333			357.25
		0.129			0.129			0.172				336			587.333			299
		0.129			0.129			0.172				689			579.333			554.25
		0.129			0.129			0.172				460.667			505			550.25
		0.129			0.129			0.172				392			475.333			499.75
		0.129			0.129			0.172				501			445			515.5
		0.129			0.129			0.172				469.333			609.333			602
		0.129			0.129			0.172				536.333			606.333			418.25
		0.129			0.129			0.172				207.667			871.667			338
		0.129			0.129			0.172				462			697			517.5
		0.129			0.129			0.172				514.333			684.333			221.75
		0.129			0.129			0.172				375			799			318.75
		0.129			0.129			0.172				652			589.333			577.75
		0.129			0.129			0.172				227.667			512.667			584.5
		0.129			0.129			0.172				709			633.667			466.75
		0.129			0.129			0.172				387.333			425.333			534
		0.129			0.129			0.172				488.667			623.333			607.5
		0.129			0.129			0.172				393.333			449.333			348.5
		0.129			0.129			0.172				550.333			839.667			382
		0.129			0.129			0.172				653.333			818.333			428
		0.129			0.129			0.172				432.667			686.667			508.25
		0.129			0.129			0.172				518			696			340.5
		0.129			0.129			0.172				501.333			787			556.75
		0.129			0.129			0.172				551.667			621.667			292.5
		0.129			0.129			0.172				473.667			579			462.25
		0.129			0.129			0.172				394.667			677			376.75
		0.129			0.129			0.172				342.667			733			509
		0.129			0.129			0.129				428			779			735.333
		0.129			0.129			0.129				218.333			601.667			422.333
		0.129			0.129			0.129				516			584			520.333
		0.129			0.129			0.129				313			520.333			350.667
		0.129			0.129			0.129				343.333			736.667			811.333
		0.129			0.129			0.129				443			267			497.333
		0.129			0.129			0.129				208.667			423.667			765
		0.129			0.129			0.129				510.667			453			517
		0.129			0.129			0.129				445.333			579			414.667
		0.129			0.129			0.129				495.333			1005.67			831.667
		0.129			0.129			0.129				628			751.333			284.667
		0.129			0.129			0.129				452.667			577.333			678.667
		0.129			0.129			0.129				516.333			448.667			609.333
		0.129			0.129			0.129				560			487.667			671
		0.129			0.129			0.129				552.667			726.667			330.333
		0.129			0.129			0.129				587.333			934.667			642.667
		0.129			0.129			0.129				485			448			464.667
		0.129			0.129			0.129				500.667			419.333			355
		0.129			0.129			0.129				370.333			550			593
		0.129			0.129			0.129				466.667			616			414
		0.129			0.129			0.129				421.333			604.333			392
		0.129			0.129			0.129				405			939.667			545
		0.129			0.129			0.129				361.667			665			748.667
		0.129			0.129			0.129				636.333			559.333			565.333
		0.129			0.129			0.129				470			674.333			250.667
		0.129			0.129			0.129				624.333			532			441
					0.129			0.129							564.333			454.667
					0.129			0.129							506.667			463
					0.129			0.129							622			550
					0.129			0.129							610			588.667
					0.129			0.129							640			510
					0.129			0.129							675.667			587.333
					0.129			0.129							659.667			409.333
					0.129			0.129							508.667			494.333
					0.129			0.129							415.667			634.333
					0.129			0.129							736.333			552.333
					0.129			0.129							529.333			600
					0.129			0.129							729.667			599.333
					0.129			0.129							628.333			460.333
					0.129			0.129							458.333			550.667
					0.129			0.129							714.333			761
					0.129			0.129							568.667			501.333
					0.129			0.129							576.667			276.667
					0.129			0.129							727.667			536.333
					0.129			0.129							517			460.667
					0.129			0.129							566.667			427.333
					0.129			0.129							671.333			262
					0.129			0.129							598			572.333
					0.129			0.129							375.333			520.667
					0.129			0.129							564.333			727.333
					0.129			0.129							393.667			488.667
					0.129			0.129							596.667			386
					0.129			0.129							469			815.667
					0.129			0.129							612.333			786.333
					0.129			0.129							244.333			387.667
					0.129			0.129							446.667			627.667
					0.129			0.129							459.333			501.333
					0.129			0.129							361			530.333
					0.129			0.129							483			633.667
					0.129			0.129							490			560
					0.129			0.129							343.333			521.667
					0.129			0.129							569			634.667
					0.129			0.129							576.333			545.333
					0.129			0.129							613.667			749.667
					0.129			0.129							462.667			579.667
					0.129			0.129							797.667			566.333
					0.129			0.129							624			216.667
					0.129			0.129							346.667			753
					0.129			0.129							730.667			449.667
					0.129			0.129							628			362.333
					0.129			0.129							530.333			654.333
								0.129										381.667
								0.129										607
								0.129										535.667
								0.129										301.333
								0.129										497
								0.129										496.667
								0.129										622.667
								0.129										413
								0.129										525
								0.129										264
								0.129										702.333
								0.129										340.667
								0.129										488
								0.129										720
								0.129										482.333
								0.129										420.333
								0.129										560
								0.129										375.333
								0.129										475.333
								0.129										300.667
								0.129										704.333
								0.129										477
								0.129										429.333
								0.129										538.667
								0.129										457
								0.129										725.333
								0.129										459
								0.129										418
								0.129										390.667
								0.129										497
								0.129										352.667
								0.129										466.333
								0.129										463.333
								0.129										414.667
								0.129										365.333
								0.129										553.333
								0.129										440.667
								0.129										480.333
								0.129										436.667
								0.129										467.333
								0.129										280
								0.129										478.333
								0.129										493
								0.129										391.667
								0.129										619
								0.129										293
								0.129										512.667
								0.129										396
								0.129										405.667
								0.129										212.667
								0.129										437
								0.129										463.333
								0.129										558.333
								0.129										432.333
								0.129										212.667
								0.129										466.333
								0.129										348
								0.129										474.667
								0.129										244.667
								0.129										193.667
								0.129										369
								0.129										468
								0.129										519
								0.129										348.667
								0.129										353
								0.129										320.333
								0.129										337.333
								0.129										403
								0.129										440.667
								0.129										335.333
								0.129										535
								0.129										315
								0.129										489
								0.129										377
								0.129										547.667
								0.129										354.333
								0.129										396
								0.129										418
								0.129										539
								0.129										475.333
								0.129										479.333
								0.129										341.667
								0.129										286
								0.129										531.667
								0.129										487.667
								0.129										282
								0.129										327
								0.129										294.667
								0.129										460.667
								0.129										192.667
								0.129										486
								0.129										412
								0.129										447
								0.129										398.667
								0.129										343
								0.129										447
								0.129										395.667
								0.129										438.333
								0.129										541.333
								0.129										318
								0.129										453
								0.129										356.667
								0.129										512.333
